# Supplementary material for: Design, Synthesis, Biological Evaluation, 2D-QSAR Modeling, and Molecular Docking Studies of Novel 1H-3-Indolyl Derivatives as Significant Antioxidants
Source: MDPI journal article supplement (doi:10.3390/ijms221910396), 2021-09-27
Supplement: s1 [file s1]

# Design, Synthesis, Biological Evaluation, 2D-QSAR Modeling, and Molecular Docking Studies of Novel 1*H*-3-Indolyl Derivatives as Significant Antioxidants

Maged A. Aziz <sup>1,\*</sup>, Wesam S. Shehab <sup>1</sup>, Ahmed A. Al-Karmalawy <sup>2</sup>, Ahmed F. EL-Farargy <sup>1</sup> and Magda H. Abdellattif <sup>3</sup>

## Supplementary document

### Antioxidant activity

All chemicals included L-ascorbic acid were provided from Sigma-Aldrich (U.S.A.), and all solvents included annular ethanol delivered from El-NASR Co., Egypt. This assay follows the methodology of Re *et al.* ABTS method is a common assay in evaluation the potency of antioxidant activities of many pure organic candidates. ABTS method is a typical assay in evaluating the potency of antioxidant activities of many pure organic candidates. ABTS is an abbreviation of the chemical compound 2,2'-Azinobis(3-ethylbenzothiazoline-6-sulfonic acid). The chemical structure of this compound is very stable in free radical cation form (ABTS<sup>•+</sup>). ABTS<sup>•+</sup> can react with any compound that generates a hydrogen atom (H-Donor) or an electron such as phenols and thiols, where ABTS<sup>•+</sup> reacts as H or an electron acceptor **Figure S1**.

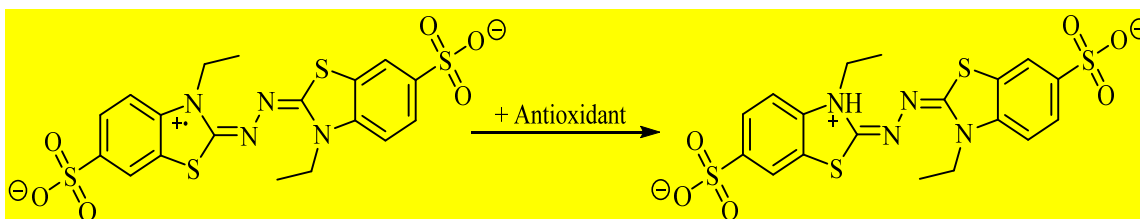

**Figure S1.** The reaction of ABTS<sup>•+</sup> with antioxidant.

This transformation of hydrogen or electron converts ABTS<sup>•+</sup> solution from a dark green one to a colorless solution. Equal amounts of ABTS<sup>•+</sup> and potassium persulphate K<sub>2</sub>S<sub>2</sub>O<sub>8</sub> (7 mM & 3.5 mM, respectively) were added from their stock solutions to make the ABTS<sup>•+</sup> standard solution. The yielded mixture was left to stand at room temperature in the darkness for 13-15 h overnight. The ABTS<sup>•+</sup> stock solution is appropriate for use after the completion of the reaction. The evidence of finishing the reaction is the stability of the spectrophotometric absorbance of the ABTS<sup>•+</sup> solution at a wavelength of 735 nm. ABTS<sup>•+</sup> stock solution may be stored at room temperature in

the darkness for about 2-3 days and still valid over this period to use. The present assay was prepared the ABTS<sup>•+</sup> working solution from stock one by dilution in annular ethanol to get an absorbance  $A_{\text{blank}}$  of  $0.7 \pm 0.02$  at a wavelength of 735 nm. In an incubator, the produced solution was controlled at a temperature of 30 °C and was equilibrated. In this assay,  $A_{\text{blank}}$  was adapted to be accurately 0.7 at time = 0, i.e., before the determination of the absorbance for all the targeted compounds. In order to measure the scavenging activities of the targeted compounds against the free radicals 1.5 ml of dark blue ABTS<sup>•+</sup> working solution was mixed with 10 µl of the compounds solutions (2, 3, 4, 7, 8, 10, 12b, 12d, 12e). These steps are repeated using various concentrations of the tested compounds solutions over a range of 10-300 µM. These various concentrations are achieved by dilution using distilled water and annular ethanol or both based on their solubility degree. After adding ABTS<sup>•+</sup> solution with different tested candidates, the change in absorbance value was determined over various rang of time at 0, 0.5, 1, and 5 mins in order to manage to achieve the steady-state value of absorbance. In our present assay, the steady-state value was achieved after 15 min. By generalization,  $A_{\text{test}}$ , absorbance value for each tested candidate, was reported after 15 min of addition ABTS<sup>•+</sup> solution tested candidate solution. The mean of values was recorded. Each concentration for each tested sample at a specific time was recorded separately for all compounds, then every three separate measurements were determined, and the mean was taken. The antioxidant activity of each compound against ABTS<sup>•+</sup> was calculated from the percent reduction in absorbance values, according to the following equation:

$$\text{ABTS}^{\bullet+} \text{ radical cation scavenging activity of test compound (\%)} = 100(A_{\text{blank}} - A_{\text{test}})/A_{\text{blank}}.$$

Where,

$A_{\text{test}}$  or  $A_{15}$  = The absorbance value for each tested candidate after 15 min of addition ABTS<sup>•+</sup> solution.

$A_{\text{blank}}$  or  $A_0$  = The absorbance value of ABTS<sup>•+</sup> itself before adding the tested candidates.

i.e., Time = 0. ( $A_{\text{blank}}$  was adjusted to be 0.70)

In this assay, after 15 minutes of reaction, the IC<sub>50</sub> (inhibitory concentration 50 percent) of each of the test compounds was determined and calculated by Unico spectrophotometer 1200 USA and compared to that of L-ascorbic acid as the reference and standard.

## QSAR Study

### Data set for QSAR studies

A set of 10 derivatives of 1*H*-indol-3-yl compounds from antioxidant activities was assisted and examined by 2D-QSAR to evaluate the effect of its structure varieties. Initially, to split data into training and test 11 compounds, *Kennard Stone* (ks) statistic method was used for data validation of 7 compounds, and about 80% of the data set was distributed as training and the remaining as a test set during the use of this application. The negative logarithmic scale ( $\text{pIC}_{50} = -\log \text{IC}_{50}$ ) was used. The 2D structural coordinates of descriptive molecules were sketched and saved in mol2. These compounds' structures were transferred into the MOE database file using the MOE-DB option, which converted coordinates of all the compounds into 3D structures by MOE wash module. Using MOE default wash command, partial charges were performed on the compounds, and their energy was corrected using the current MMFF94 force field.

### Molecular descriptors

Several 2D and 3D structural fragments and graph invariants contribute by MOE to determine the physicochemical properties of compounds. For this purpose, all the compounds (both training and test set) with some 2D descriptors present in MOE were calculated. Subsequently, "QuaSAR-Contingency," a statistical option in MOE was applied for the selection of suitable descriptors for QSAR modeling. The contingency analysis proposed 10 2D descriptors including AM1\_Dipole, a descriptor for Total energy (kCal/mol)(AM1\_E, a descriptor for the heat of formation calculated by empirical method (AM1-HF), descriptor for calculating the energy of the lowest unoccupied molecular orbital by empirical method (AM1-LUMO), descriptor for calculating the energy of highest occupied molecular orbital by empirical method (AM1-HOMO), ionization potential(eV)(AM\_IP), number of double bonds (b\_double), descriptor of acidity at pH=7(h\_pKa), and the descriptor of basicity at pH=7(h\_pKb), were calculated. Consequently, the QSAR model was obtained by the partial least squares (PLS) method.

### **Experimental data model development**

QSAR model was improved based on the actual antioxidant activities (as dependant variable) and the descriptors as model fields. For the training data set, regression analysis was performed, and  $r^2$  root means square error (RMSE) values of the fit were reported. This fit model was saved as the QSAR model and used for the prediction of activities of compounds of the test data set.

### **Cross-Validating the model**

The durability and power of the above QSAR fit were adopted for both model validation and cross-validation. These validation metrics estimate the predictive activities and the residual for the training set molecules. The predicted, residual, and Z-score values of acceptable thresholds were calculated for both model and cross-validations.

### **Graphical analysis**

The predictive capability of the model was evaluated using a correlation plot by plotting the values on the x-axis and the predicted IC<sub>50</sub> activity on the y-axis. This correlation plot was used to identify outliers that have a Z-score beyond the range of 2.

### **Docking study**

A molecular docking study of the sixteen newly designed and synthesized indolic compounds was performed using MOE 2019.0102 program. The newly synthesized compounds were drawn using ChemDraw, imported into the MOE program window, converted for their 3D forms, adjusted for the partial charges, and energy minimized as described earlier. The database was built containing the newly synthesized candidates (**1-12a-e**) together with the co-crystallized ascorbic acid as a reference standard. A general docking process was performed using the site of the co-crystallized ascorbic acid inside cytochrome *c* peroxidase as the docking site. Also, all the other docking parameters were adjusted as previously discussed in detail. Moreover, it is worth mentioning that a program validation process was performed at first before applying the docking process by

redocking the co-crystallized ascorbic acid at its binding pocket of the cytochrome *c* peroxidase enzyme. A valid performance was confirmed by obtaining a low RMSD value (<1).

## Chemistry

All chemicals included 3-Acetylindole were provided from Sigma-Aldrich (U.S.A.), and all solvents included annular ethanol delivered from El-NASR Co., Egypt. All the reactions were carried out with readily available reagents that were utilized without additional purification as received. Digital Electrothermal IA 9100 Series apparatus Cole-Parmer, Beacon Road, Stone, Staffordshire, ST15 OSA, UK) used to measure the melting points that they are uncorrected. The mass spectrum was recorded in the Thermo scientific GCMS model (ISQLT) via the direct probe controller inlet part to a single quadrupole mass analyser utilizing Thermo X-Calibur software, at Al-Azhar University, (RCMB), Naser City, Cairo. IR spectra were carried out in the range from 4000 to 400  $\text{cm}^{-1}$  on (Thermo-Fisher Scientific) FT-IR PLUS spectrometer ( $\nu$  by  $\text{cm}^{-1}$ ) utilizing potassium bromide disks (KBr) at the microanalytical Laboratory, Faculty of Science, Cairo University, Egypt. C, H, and N analyses were carried out on a PerkinElmer CHN 2400.  $^1\text{H}$  and  $^{13}\text{C}$ -NMR spectra were carried out on a Bruker NMR spectrophotometer at 400 MHz in DMSO- $d_6$  using tetramethylsilane (TMS) as the internal reference standard, chemical shifts are expressed in  $\delta$  which given in parts per million (ppm), and DMSO- $d_6$  was used as the solvent.

## ANALYSIS DATA

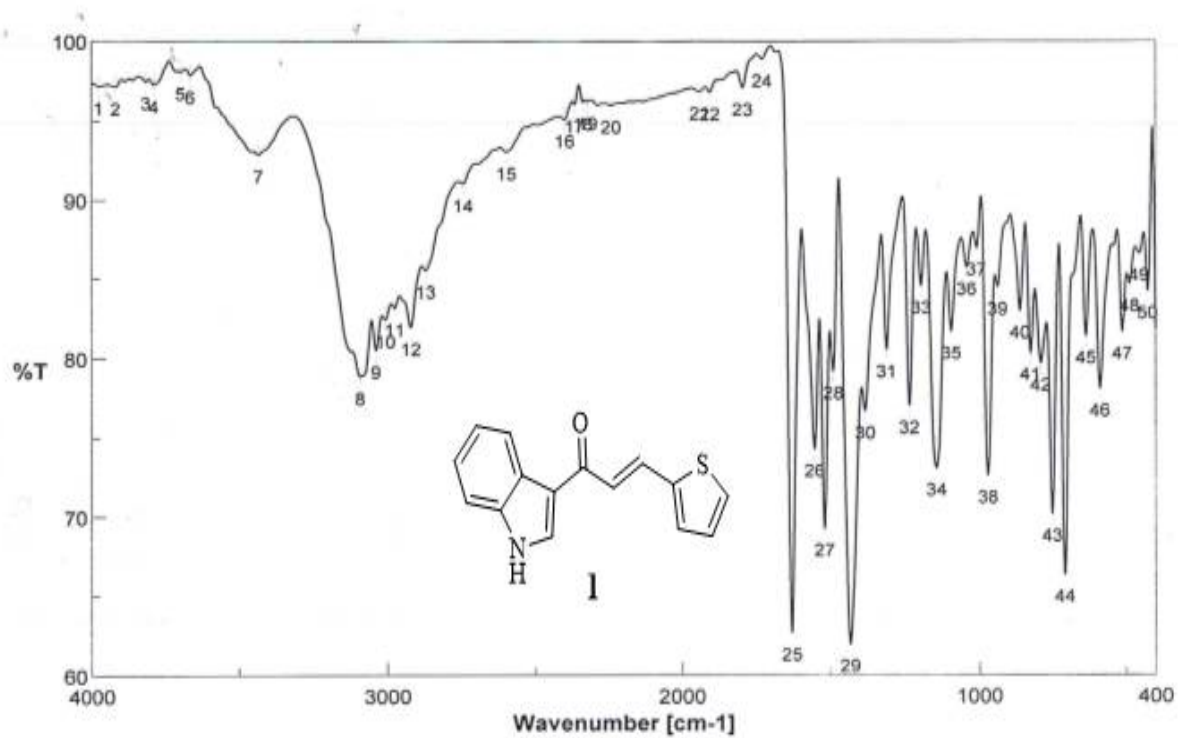

|                |                   |
|----------------|-------------------|
| Accumulation   | 16                |
| Resolution     | 4 cm-1            |
| Zero Filling   | ON                |
| Apodization    | Cosine            |
| Gain           | Auto (8)          |
| Scanning Speed | Auto (2 mm/sec)   |
| Date/Time      | 8/27/2020 11:03AM |
| Update         | 8/27/2020 11:08AM |
| Operator       | IR                |
| File Name      | Memory#46         |
| Sample Name    | W1                |
| Comment        |                   |

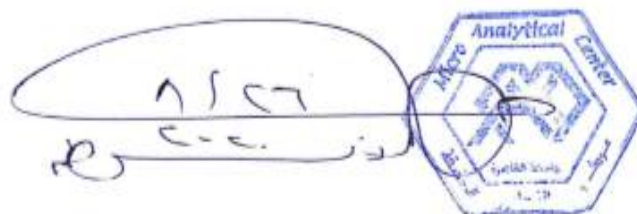

**IR spectrum for compound 1**

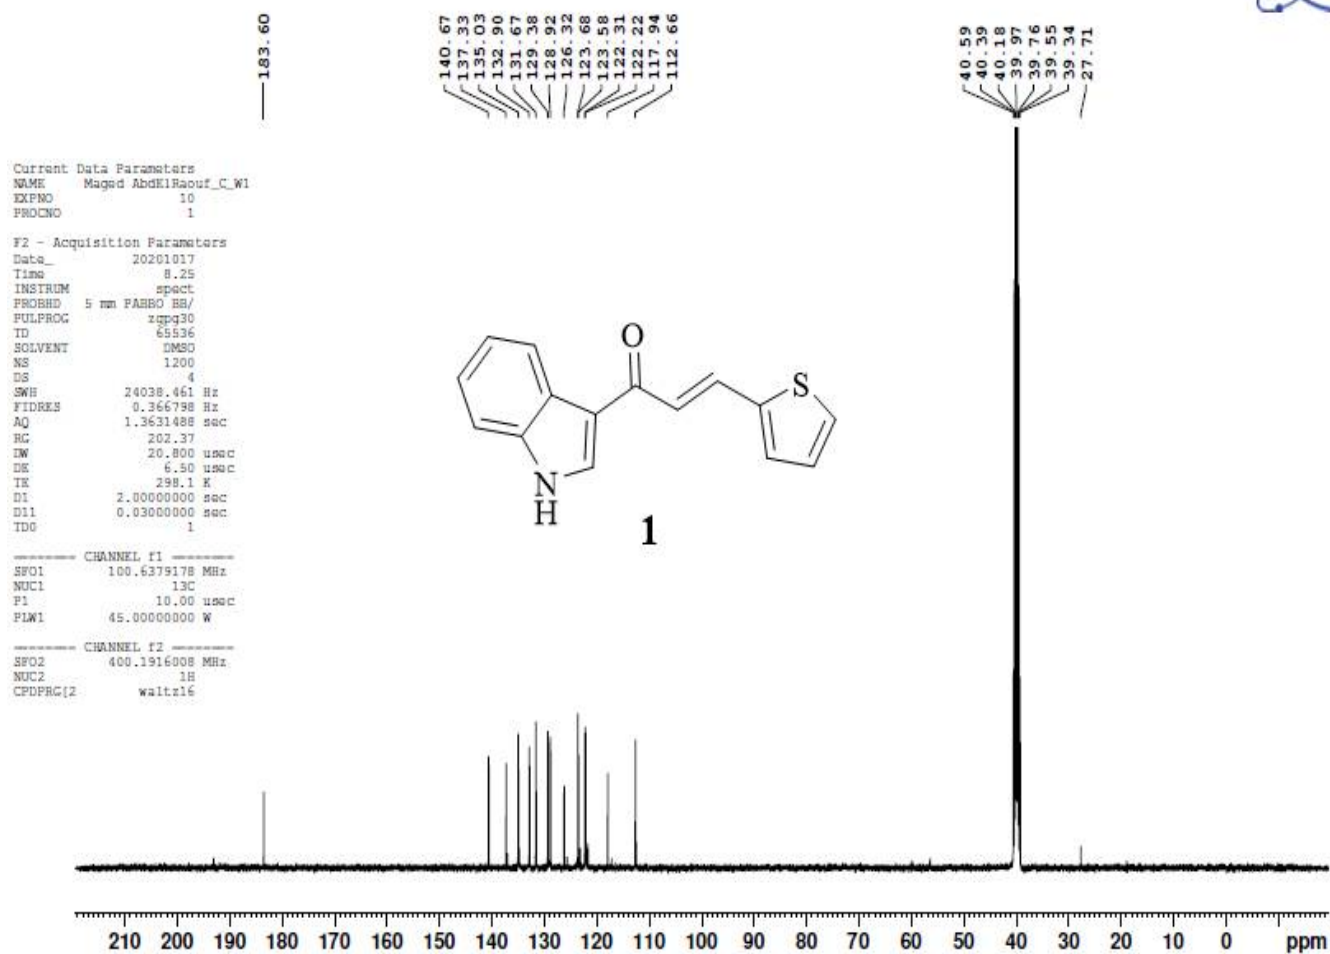

<sup>13</sup>C-NMR spectrum for compound 1

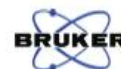

Current Data Parameters  
NAME Maged AbdElRaouf\_C\_W11  
EXPNO 10  
PROCNO 1

F2 - Acquisition Parameters  
Date\_ 20201017  
Time 9.38  
INSTRUM spect  
PROBHD 5 mm PABBO BBI  
PULPROG zgpg30  
ID 65536  
SOLVENT DMSO  
NS 1200  
DS 4  
SWH 24038.461 Hz  
FIDRES 0.366798 Hz  
AQ 1.3631488 sec  
RG 202.37  
DW 20.800 usec  
DE 6.50 usec  
TE 298.0 K  
D1 2.0000000 sec  
D11 0.0300000 sec  
DO 1

CHANNEL f1  
SFO1 100.6279178 MHz  
NUC1 13C  
P1 10.00 usec  
PLW1 45.00000000 W  
CHANNEL f2  
SFO2 400.1916008 MHz  
NUC2 1H  
CPDPRG2 waltz16

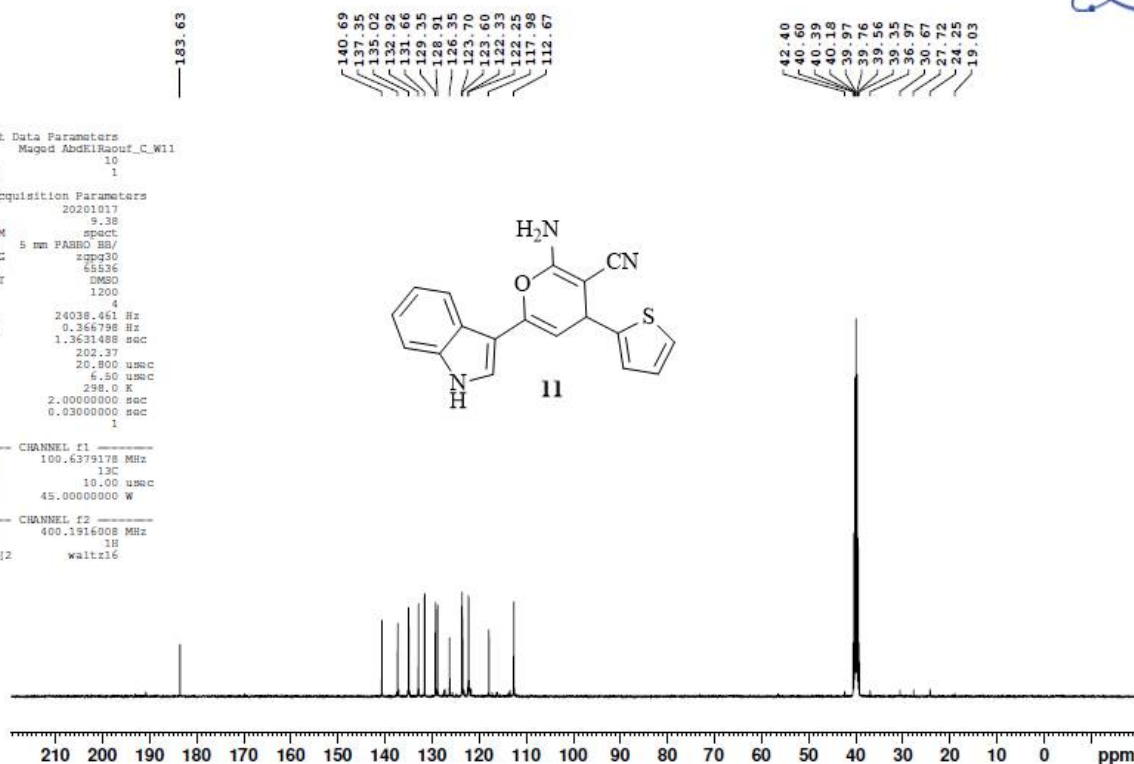

**<sup>13</sup>C-NMR spectrum for compound 1**



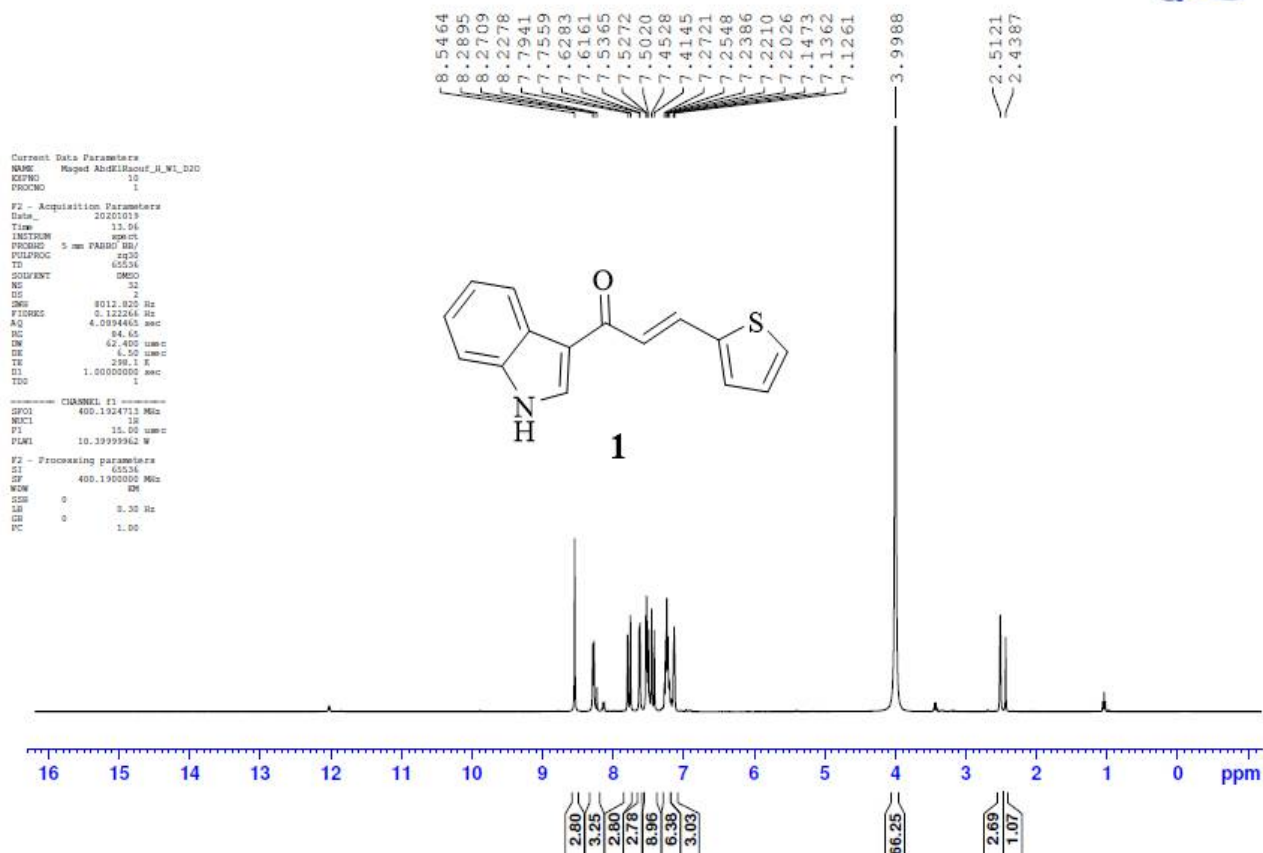

**<sup>1</sup>H-NMR (D<sub>2</sub>O) spectrum for compound 1**

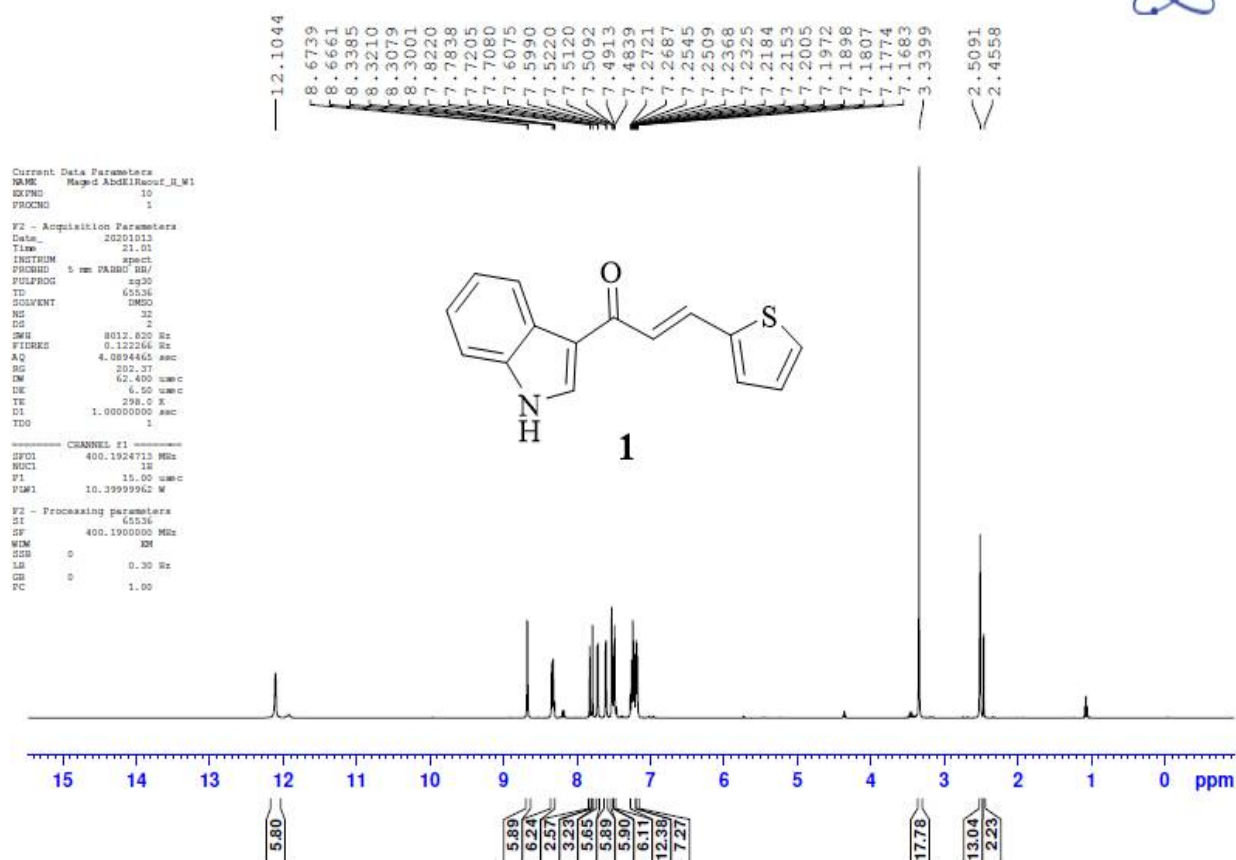

**<sup>1</sup>H-NMR spectrum for compound 1**

# Cairo University Micro Analytical Center

## DI Analysis Shimadzu Qp-2010 Plus

### Sample Information

Analyzed by : Dr. Mai Younis  
 Analyzed : 23/01/2007 07:52:21  
 Sample Name : W1  
 Sample ID :  
 Customer Name : Dr. Abdou Othman - Science - Cairo  
 Data File : C:\GCMSsolution\Data\Project1\W1\_QGD  
 Org Data File : C:\GCMSsolution\Data\Project1\W1\_QGD  
 Method File : C:\GCMSsolution\Data\Project1\High Temperature Op  
 Org Method File : C:\GCMSsolution\Data\Project1\High Temperature Op  
 Report File :  
 Tuning File : C:\GCMSsolution\System\Tune1\_default.qgt  
 SEndIfSModified by : Dr. Mai Younis  
 Modified : 23/01/2007 07:58:10

### Method

Analytical Line 1  
 IonSourceTemp : 250.00 °C  
 [MS Table]  
 --Group 1 - Event 1--  
 Start Time : 0.00min  
 End Time : 10.00min  
 ACQ Mode : Scan  
 Event Time : 0.50sec  
 Scan Speed : 1000  
 Start m/z : 50.00  
 End m/z : 500.00

Electron Voltage : 70 eV  
 Ionization Mode : EI

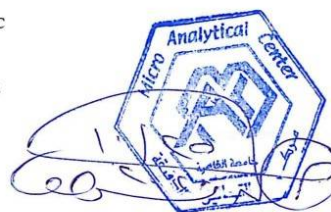

C:\GCMSsolution\Data\Project1\W1\_QGD

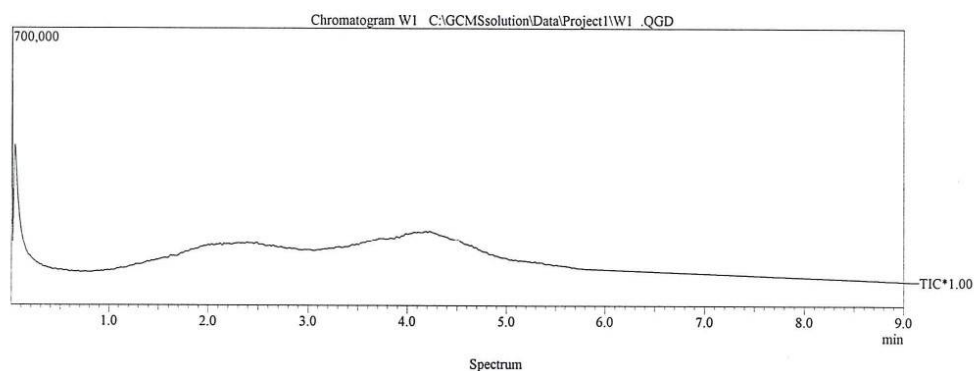

Line#:1 R.Time:3.2(Scan#:379)  
 MassPeaks:129  
 RawMode:Single 3.2(379) BasePeak:57(9439)  
 BG Mode:None Group 1 - Event 1

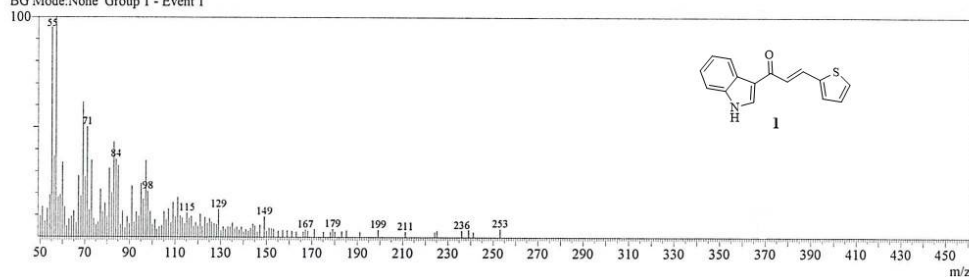

**Mass spectrum for compound 1**

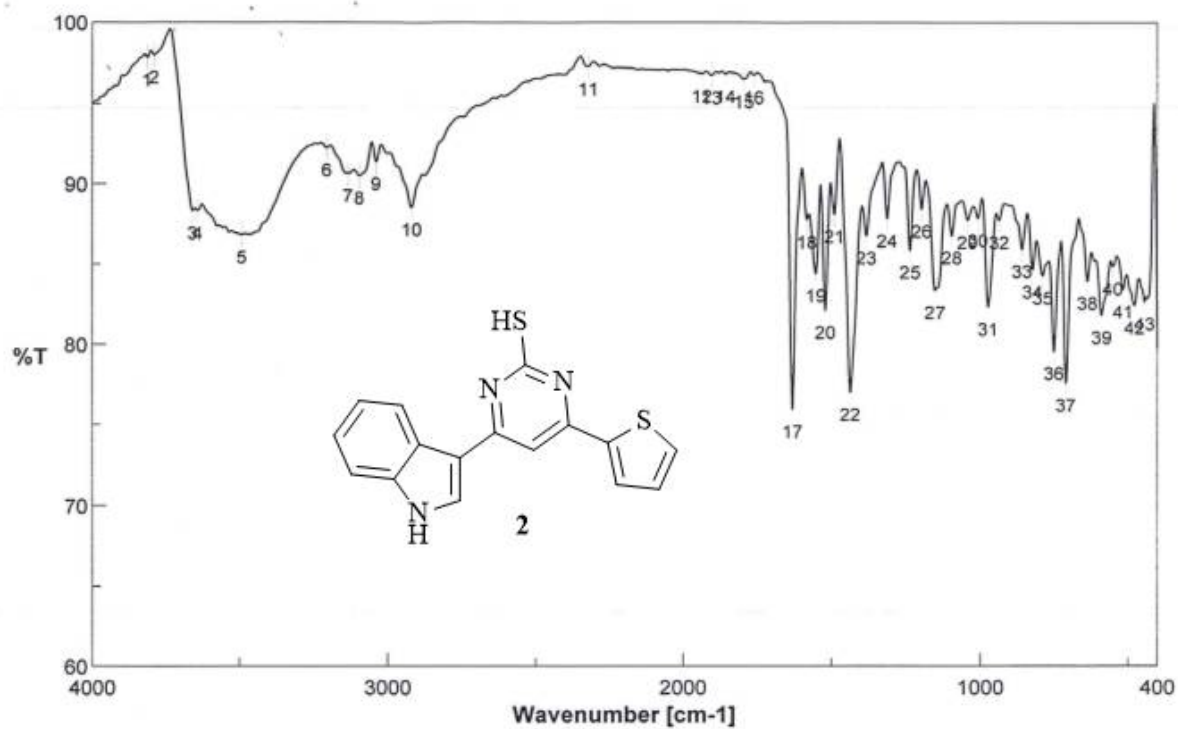

|                |                    |
|----------------|--------------------|
| Accumulation   | 16                 |
| Resolution     | 4 cm <sup>-1</sup> |
| Zero Filling   | ON                 |
| Apodization    | Cosine             |
| Gain           | Auto (8)           |
| Scanning Speed | Auto (2 mm/sec)    |
| Date/Time      | 8/27/2020 11:09AM  |
| Update         | 8/27/2020 11:11AM  |
| Operator       | IR                 |
| File Name      | Memory#59          |
| Sample Name    | W4                 |
| Comment        |                    |

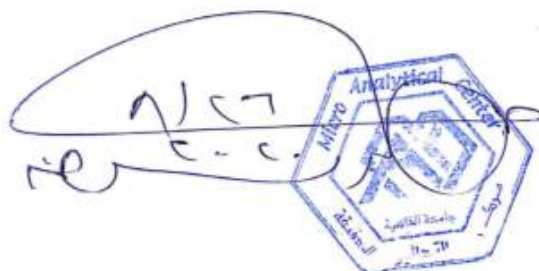

**IR spectrum for compound 2**

Abdu0thman-V4-DMSO-H1

Archive directory: /export/home/vnmr1/vnmrsys/data  
Sample directory: 005mm\_test\_12Mar2014-21:34:40  
File: PROTON

Pulse Sequence: s2pu1  
Solvent: DMSO  
Temp: 30.0 C / 303.1 K  
Mercury-300BB "NMR300"

Relax. delay 6.000 sec  
Pulse 45.0 degrees  
Acq. time 4.000 sec  
Width 6600.7 Hz  
17 repetitions  
OBSERVE H1 300.0687674 MHz  
DATA PROCESSING  
Line broadening 0.1 Hz  
FT size 65536  
Total time 58 min, 55 sec  
Date: Oct 28 2020

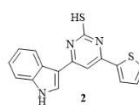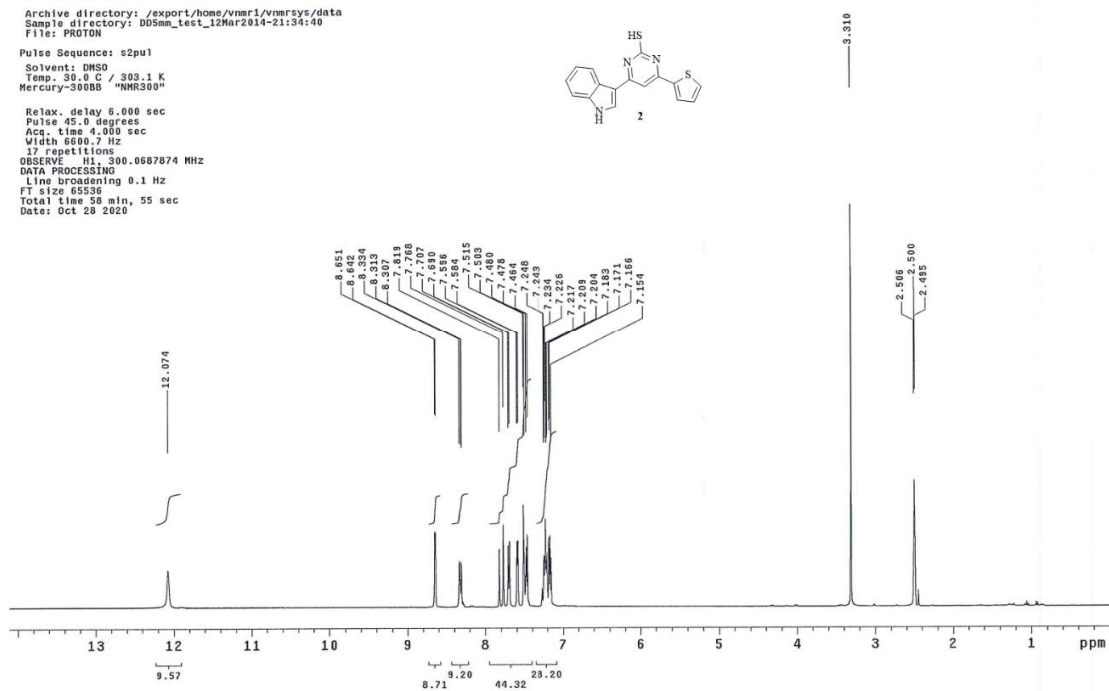

**<sup>1</sup>H-NMR spectrum for compound 2**

23-Jan-07

# Cairo University Micro Analytical Center

## DI Analysis Shimadzu Qp-2010 Plus

Sample Information  
Analyzed by : Dr. Mai Younis  
Analyzed : 23/01/2007 07:27:40  
Sample Name : W2.  
Sample ID :  
Customer Name : Dr. Abdou Othman - Science - Cairo  
Data File : C:\GCMSsolution\Data\Project1\W2.QGD  
Org Data File : C:\GCMSsolution\Data\Project1\W2.QGD  
Method File : C:\GCMSsolution\Data\Project1\High Temperature Op  
Org Method File : C:\GCMSsolution\Data\Project1\High Temperature Op  
Report File :  
Tuning File : C:\GCMSsolution\System\Tune1\default.qgt  
SEndIfSModified by : Dr. Mai Younis  
Modified : 23/01/2007 07:27:13

Method  
Analytical Line 1  
IonSourceTemp : 250.00 °C  
[MS Table]  
--Group 1 - Event 1--  
Start Time : 0.00min  
End Time : 10.00min  
ACQ Mode : Scan  
Event Time : 0.50sec  
Scan Speed : 1000  
Start m/z : 50.00  
End m/z : 500.00  
Electron Voltage : 70 eV  
Ionization Mode : EI

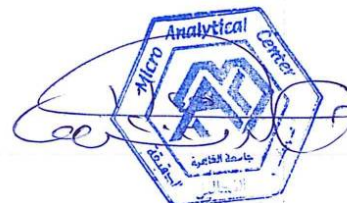

C:\GCMSsolution\Data\Project1\W2.QGD

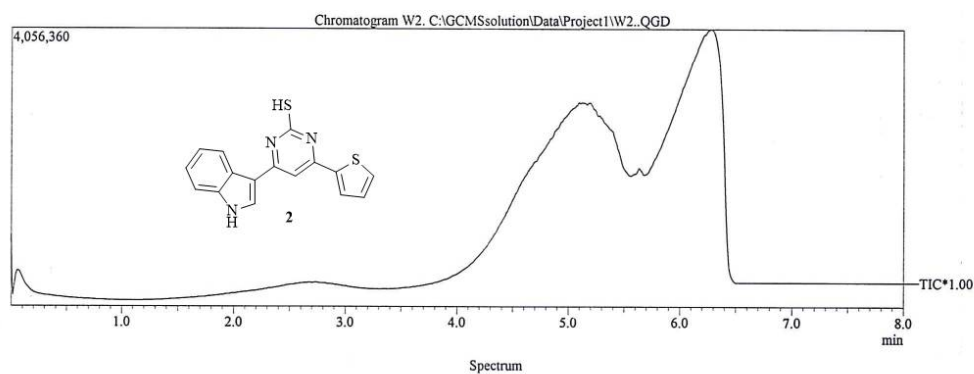

Line#:1 R.Time:5.2(Scan#:619)  
MassPeaks:216  
RawMode:Single 5.2(619) BasePeak:253(271556)  
BG Mode:None Group 1 - Event 1

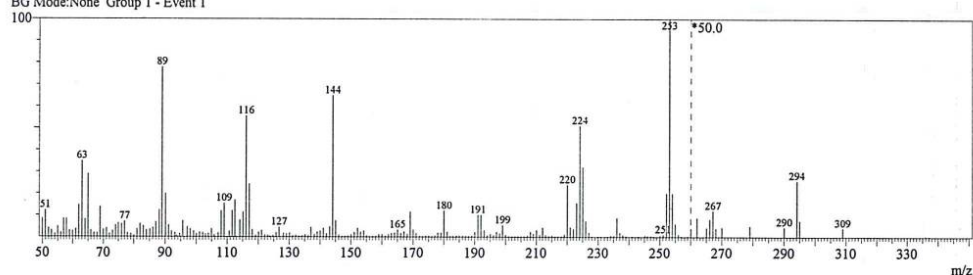

## Mass spectrum for compound 2

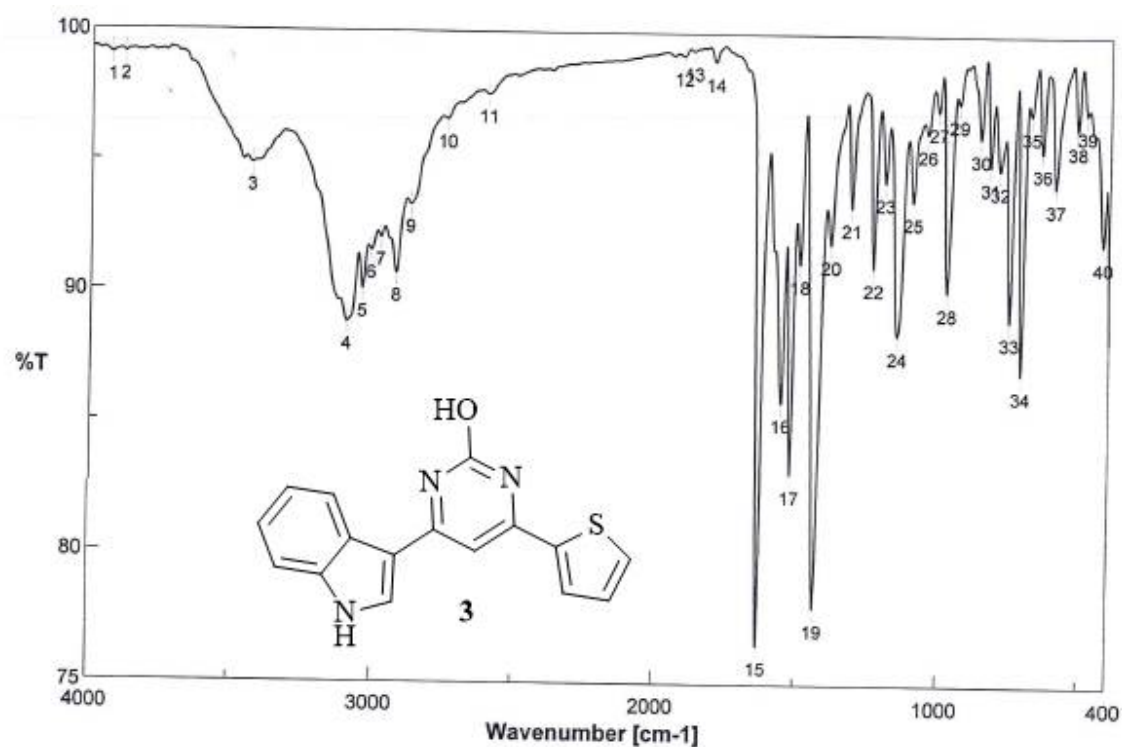

|                |                   |
|----------------|-------------------|
| Accumulation   | 16                |
| Resolution     | 4 cm-1            |
| Zero Filling   | ON                |
| Apodization    | Cosine            |
| Gain           | Auto (2)          |
| Scanning Speed | Auto (2 mm/sec)   |
| Date/Time      | 10/20/2020 0:45PM |
| Update         | 10/20/2020 0:46PM |
| Operator       |                   |
| File Name      | Memory#146        |
| Sample Name    | W 10              |
| Comment        |                   |

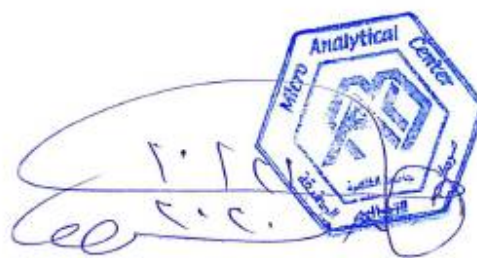

**IR spectrum for compound 3**

AbduOthman-W10-DMSO-H1

Archive directory: /export/home/vnmr1/vnmrsys/data  
Sample directory: DD5mm\_test\_12Mar2014-21:34:40  
File: PROTON

Pulse Sequence: s2pu1

Solvent: DMSO  
Temp: 30.0 C / 303.1 K  
Mercury-300BB "NMR300"

Relax. delay 6.000 sec  
Pulse 45.0 degrees  
Acq. time 4.000 sec  
Width 6600.7 Hz  
5 repetitions  
OBSERVE H1 300.0687874 MHz  
DATA PROCESSING  
Line broadening 0.1 Hz  
FT size 65536  
Total time 58 min, 55 sec  
Date: Oct 28 2020

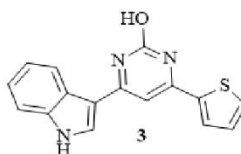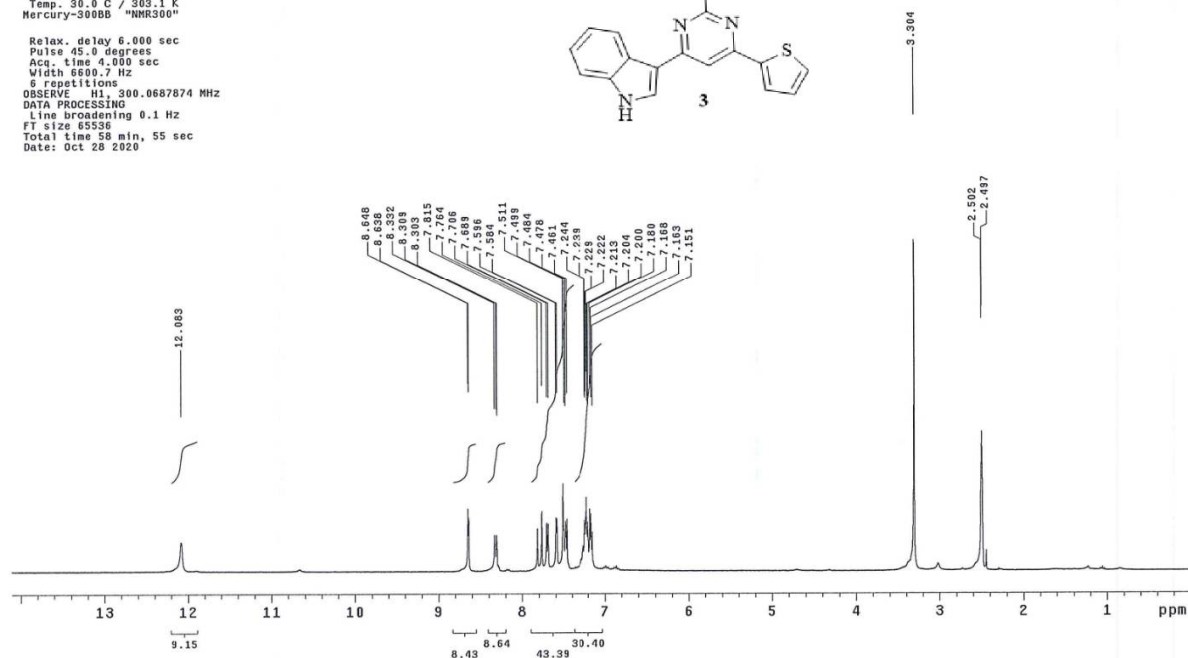

**<sup>1</sup>H-NMR spectrum for compound 3**



23-Jan-07

# Cairo University Micro Analytical Center

## DI Analysis Shimadzu Qp-2010 Plus

Sample Information  
Analyzed by : Dr. Mai Younis  
Analyzed : 23/01/2007 07:20:40  
Sample Name : W3  
Sample ID :  
Customer Name : Dr. Abdou Othman - Science - Cairo  
Data File : C:\GCMSsolution\Data\Project1\W3.QGD  
Org Data File : C:\GCMSsolution\Data\Project1\W3.QGD  
Method File : C:\GCMSsolution\Data\Project1\High Temperature Op  
Org Method File : C:\GCMSsolution\Data\Project1\High Temperature Op  
Report File :  
Tuning File : C:\GCMSsolution\System\Tune1\\_default.qgt  
SEndIfSModified by : Dr. Mai Younis  
Modified : 23/01/2007 07:27:13

### Method

Analytical Line 1  
IonSourceTemp :250.00 °C  
[MS Table]  
--Group 1 - Event 1--  
Start Time :0.00min  
End Time :10.00min  
ACQ Mode :Scan  
Event Time :0.50sec  
Scan Speed :1000  
Start m/z :50.00  
End m/z :500.00

Electron Voltage : 70 eV  
Ionization Mode : EI

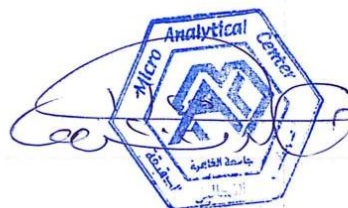

C:\GCMSsolution\Data\Project1\W3.QGD

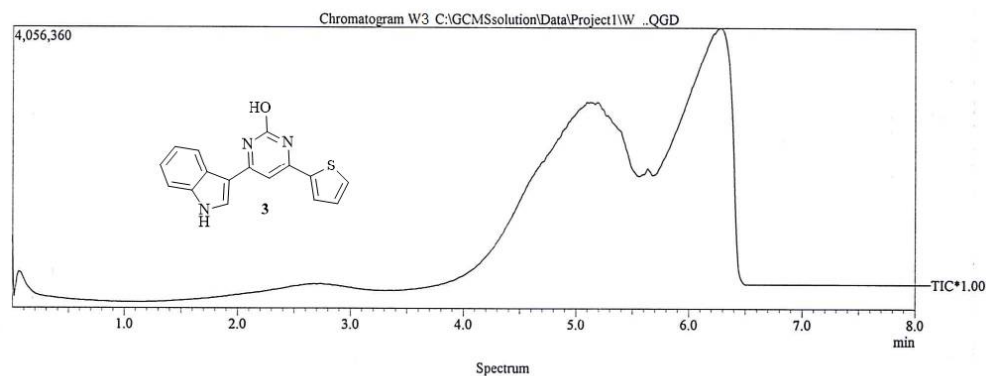

Line#1 R.Time:5.2(Scan#:619)  
MassPeaks:216  
RawMode:Single 5.2(619) BasePeak:253(271556)  
BG Mode:None Group 1 - Event 1

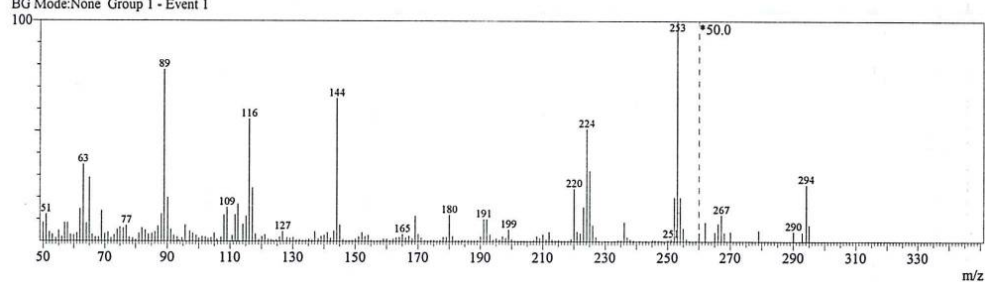

## Mass spectrum for compound 3

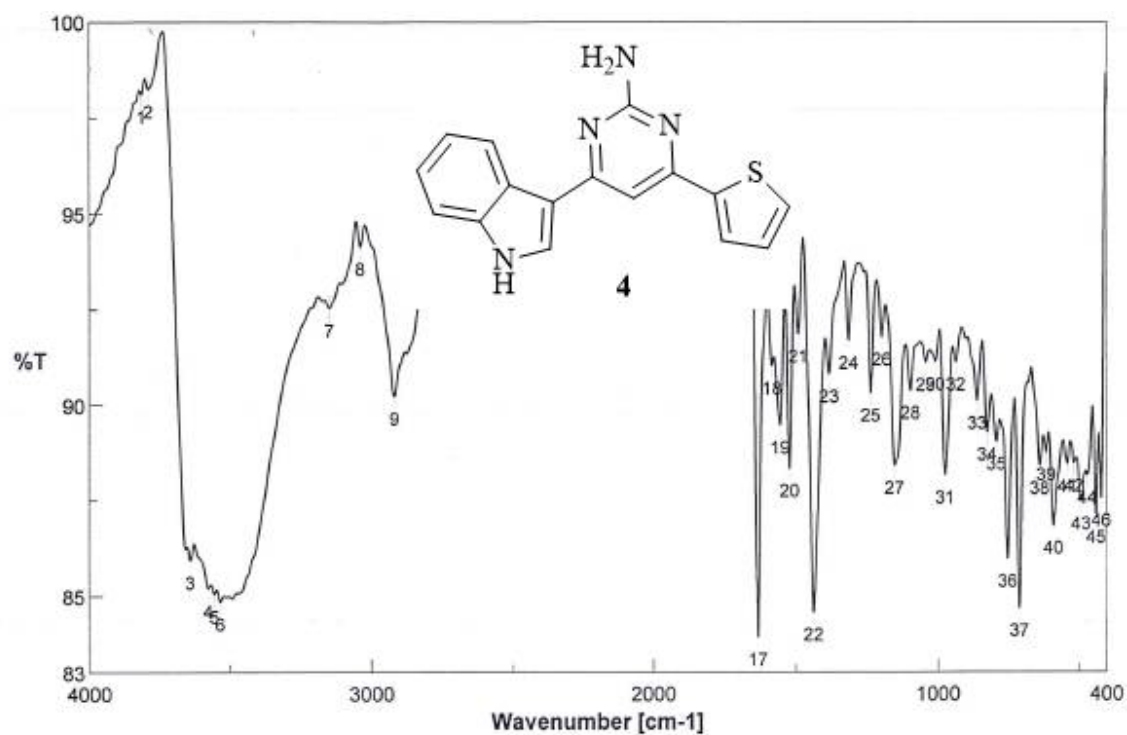

Accumulation 16  
 Resolution 4 cm<sup>-1</sup>  
 Zero Filling ON  
 Apodization Cosine  
 Gain Auto (8)  
 Scanning Speed Auto (2 mm/sec)  
 Date/Time 8/27/2020 11:14AM  
 Update 8/27/2020 11:16AM  
 Operator IR  
 File Name Memory#75  
 Sample Name W5  
 Comment

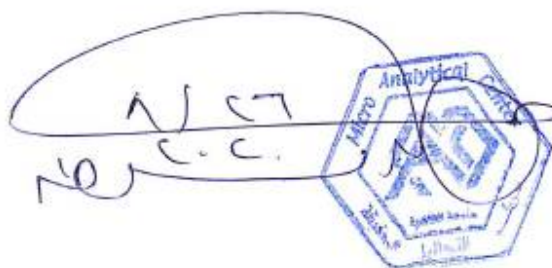

**IR spectrum for compound 4**

AbduOthman-W5-DMSO-H1

Archive directory: /export/home/vnmr1/vnmrsys/data  
Sample directory: DD5mm\_test\_12Mar2014-21:34:40  
File: PROTON

Pulse Sequence: s2pu1

Solvent: DMSO  
Temp. 30.0 C / 303.1 K  
Mercury-300BS "NMR300"

Relax. delay 6.000 sec  
Pulse 45.0 degrees  
Acq. time 4.000 sec  
Width 6600.7 Hz  
6 repetitions  
OBSERVE H1, 300.0687874 MHz  
DATA PROCESSING  
Line broadening 0.1 Hz  
FT size 65536  
Total time 58 min, 55 sec  
Date: Oct 28 2020

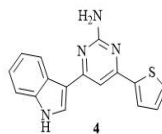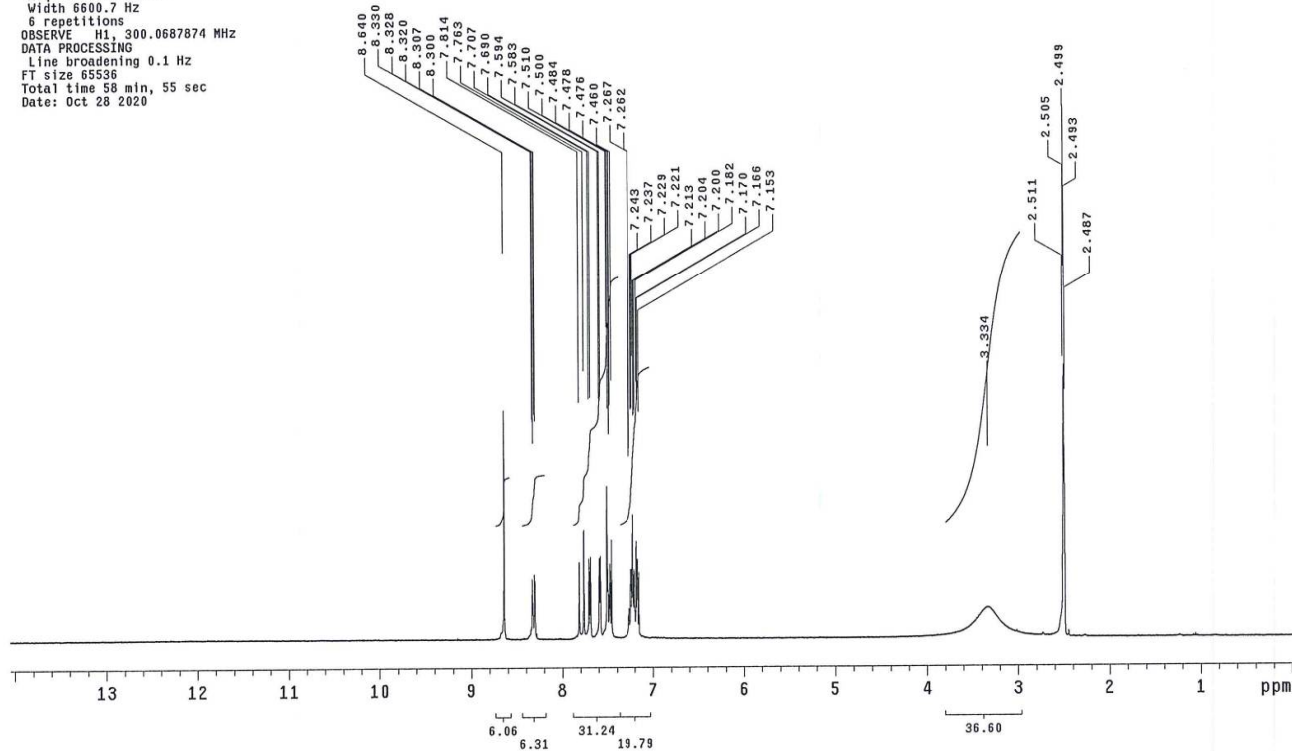

**<sup>1</sup>H-NMR spectrum for compound 4**

AbduOthman-W5-DMSO-D20-H1

Archive directory: /export/home/vnmr1/vnmrsys/data  
Sample directory: DD5mm\_test\_12Mar2014-21:34:40  
File: PROTON

Pulse Sequence: s2pu1

Solvent: DMSO  
Temp. 30.0 C / 303.1 K  
Mercury-300BB <sup>1</sup>HNR300

Relax. delay 6.000 sec  
Pulse 45.0 degrees  
Acq. time 4.000 sec  
Width 5600.7 Hz  
7 repetitions  
OBSERVE H1, 300.0687874 MHz  
DATA PROCESSING  
Line broadening 0.1 Hz  
FT size 65536  
Total time 58 min, 55 sec  
Date: Oct 28 2020

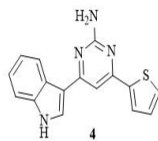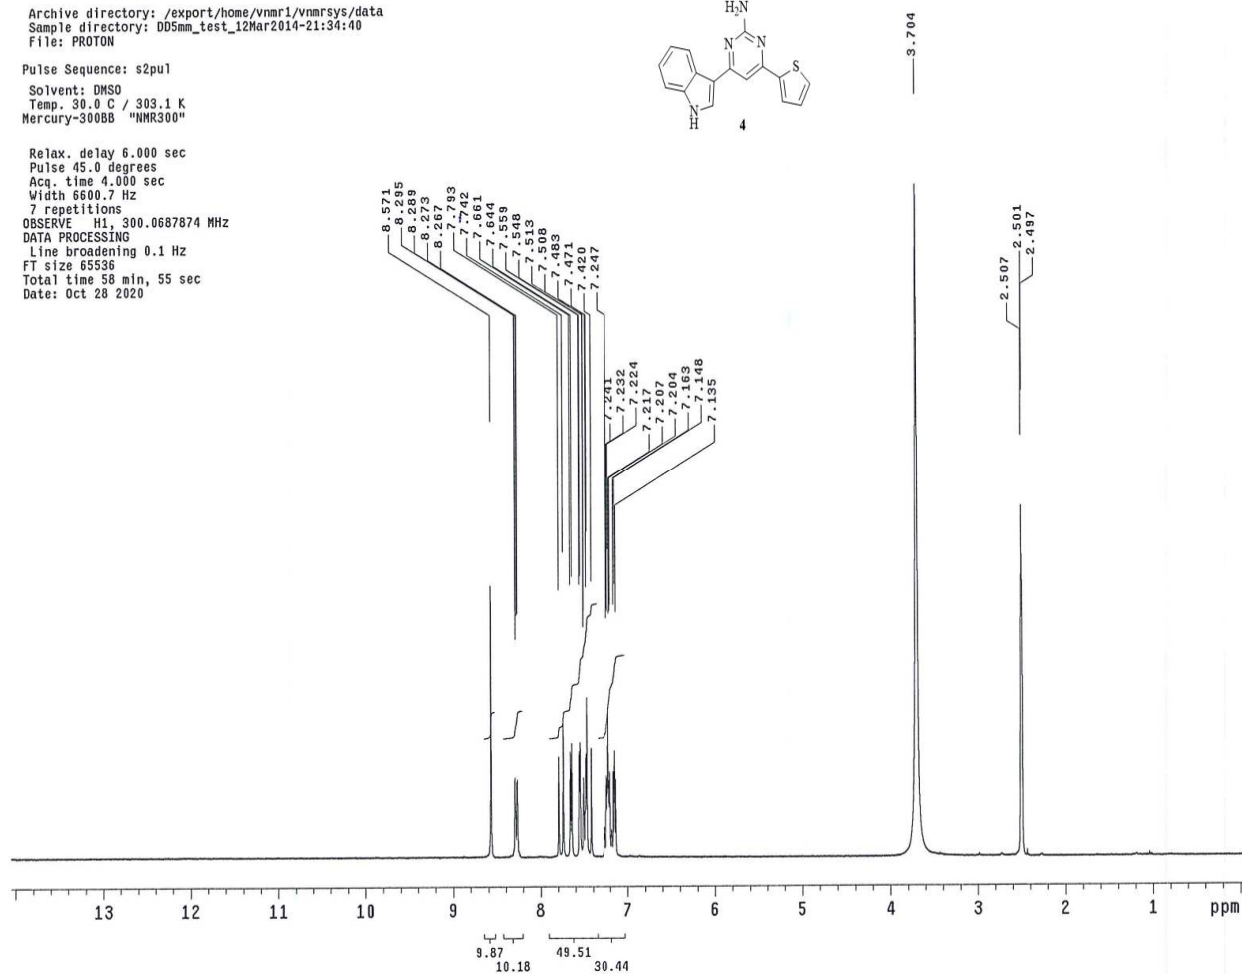

**<sup>1</sup>H-NMR spectrum for compound 4**

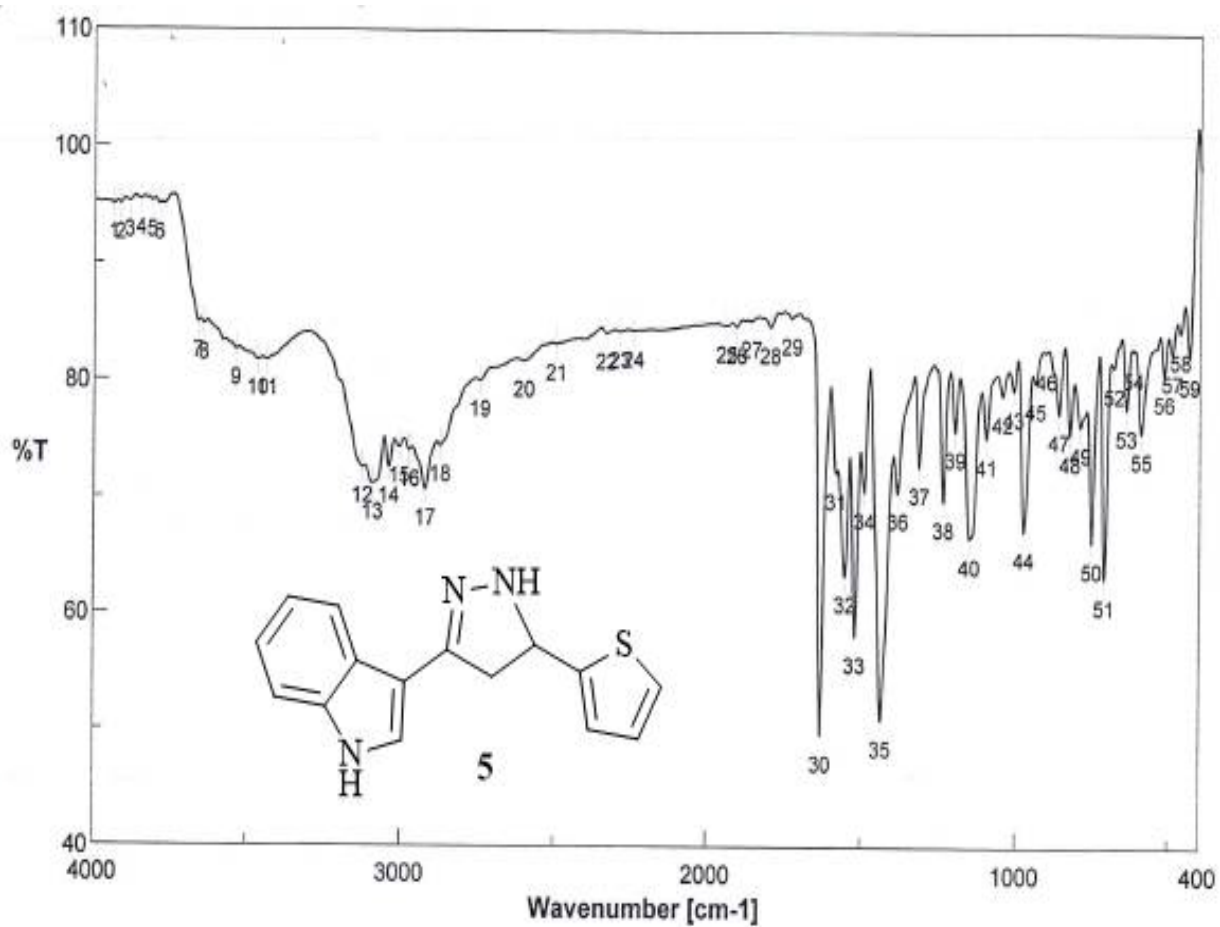

Accumulation 16  
 Resolution 4 cm<sup>-1</sup>  
 Zero Filling ON  
 Apodization Cosine  
 Gain Auto (8)  
 Scanning Speed Auto (2 mm/sec)  
 Date/Time 8/27/2020 11:14AM  
 Update 8/27/2020 11:14AM  
 Operator IR  
 File Name Memory#69  
 Sample Name W6  
 Comment

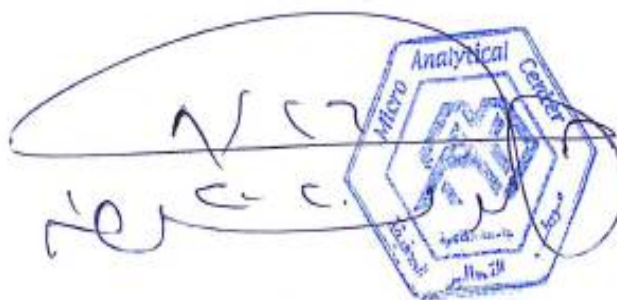

**IR spectrum for compound 5**

AbduOthman-W6-DMSO-H1

Archive directory: /export/home/vnmr1/vnmrsys/data  
Sample directory: DD5mm\_test\_12Mar2014-21:34:40  
File: PROTON

Pulse Sequence: s2pu1

Solvent: DMSO  
Temp. 30.0 C / 303.1 K  
Mercury-300BB "NMR300"

Relax. delay 6.000 sec  
Pulse 45.0 degrees  
Acq. time 4.000 sec  
Width 6600.7 Hz  
5 repetitions  
OBSERVE H1, 300.0687874 MHz  
DATA PROCESSING  
Line broadening 0.1 Hz  
FT size 65536  
Total time 58 min, 55 sec  
Date: Oct 28 2020

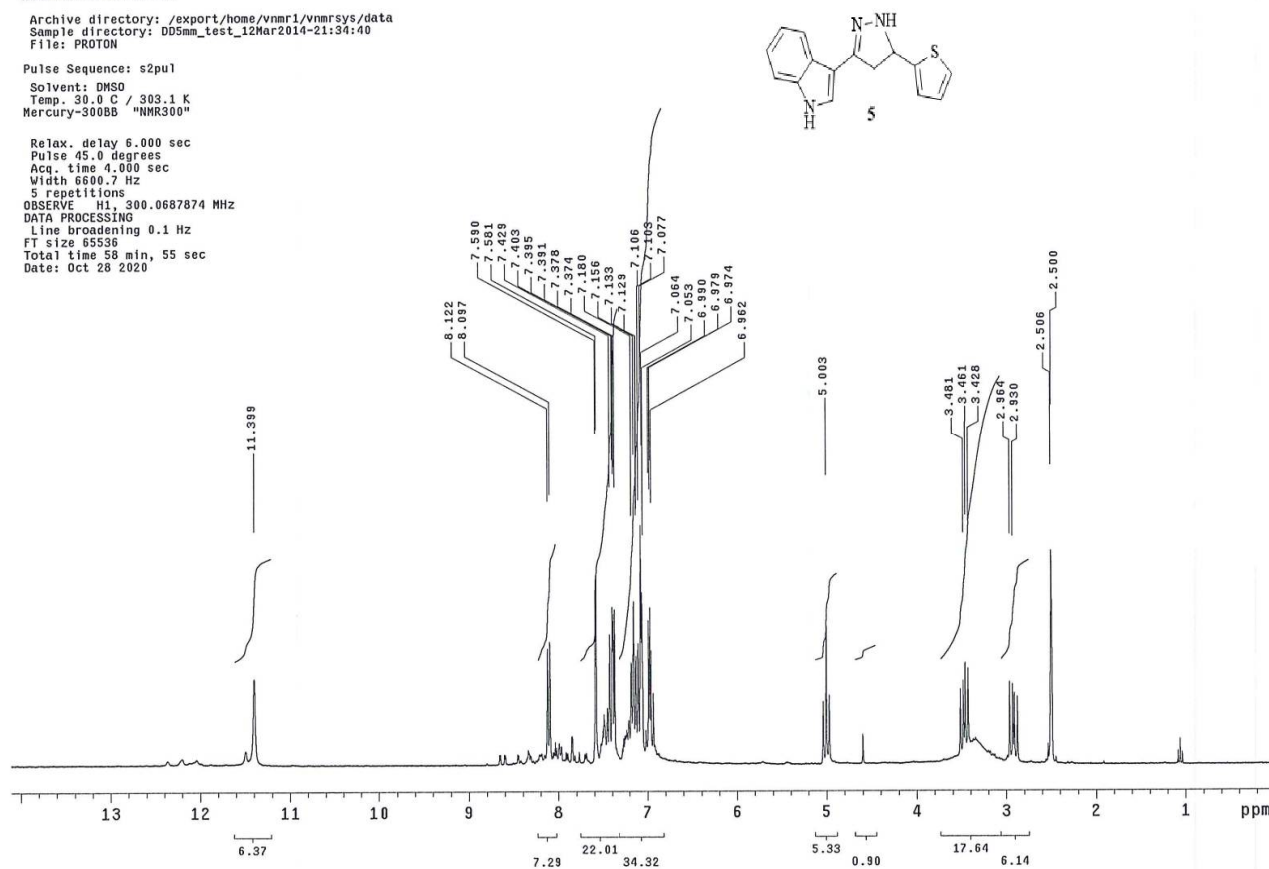

**<sup>1</sup>H-NMR spectrum for compound 5**

23-Jan-07

## Cairo University Micro Analytical Center

### DI Analysis Shimadzu Qp-2010 Plus

#### Sample Information

Analyzed by : Dr. Mai Younis  
 Analyzed : 23/01/2007 07:20:40  
 Sample Name : W5  
 Sample ID :  
 Customer Name : Dr. Abdou Othman - Science - Cairo  
 Data File : C:\GCMSsolution\Data\Project1\W5..QGD  
 Org Data File : C:\GCMSsolution\Data\Project1\W5..QGD  
 Method File : C:\GCMSsolution\Data\Project1\High Temperature Op  
 Org Method File : C:\GCMSsolution\Data\Project1\High Temperature Op  
 Report File :  
 Tuning File : C:\GCMSsolution\System\Tune1\\_default.qgt  
 SEndIfsModified by : Dr. Mai Younis  
 Modified : 23/01/2007 07:27:13

#### Method

Analytical Line 1  
 IonSourceTemp : 250.00 °C  
 [MS Table]  
 --Group 1 - Event 1--  
 Start Time : 0.00min  
 End Time : 10.00min  
 ACQ Mode : Scan  
 Event Time : 0.50sec  
 Scan Speed : 1000  
 Start m/z : 50.00  
 End m/z : 500.00

Electron Voltage : 70 eV  
 Ionization Mode : EI

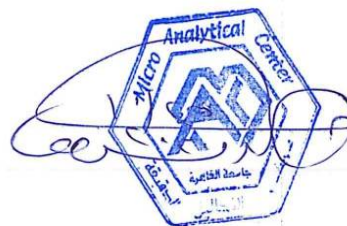

C:\GCMSsolution\Data\Project1\W5..QGD

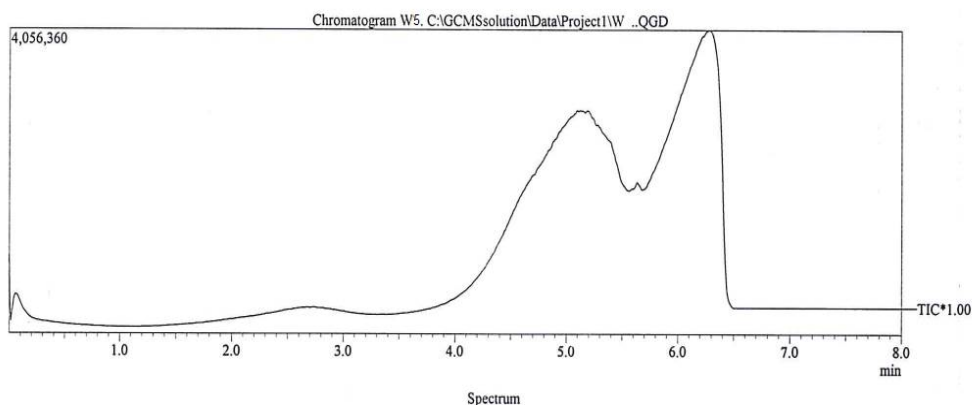

Line#:1 R.Time:5.2(Scan#:619)  
 MassPeaks:216  
 RawMode:Single 5.2(619) BasePeak:253(271556)  
 BG Mode:None Group 1 - Event 1

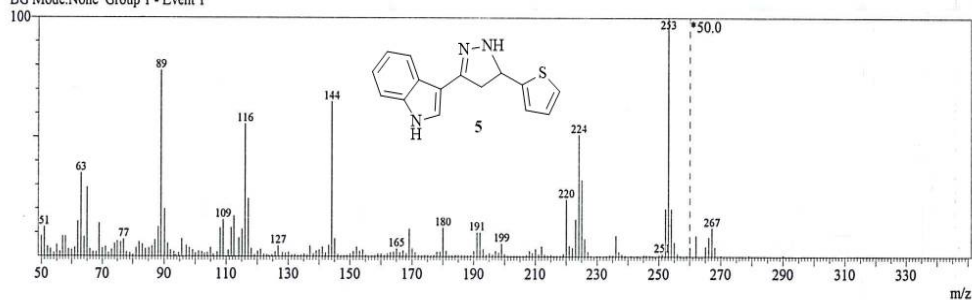

## Mass spectrum for compound 5



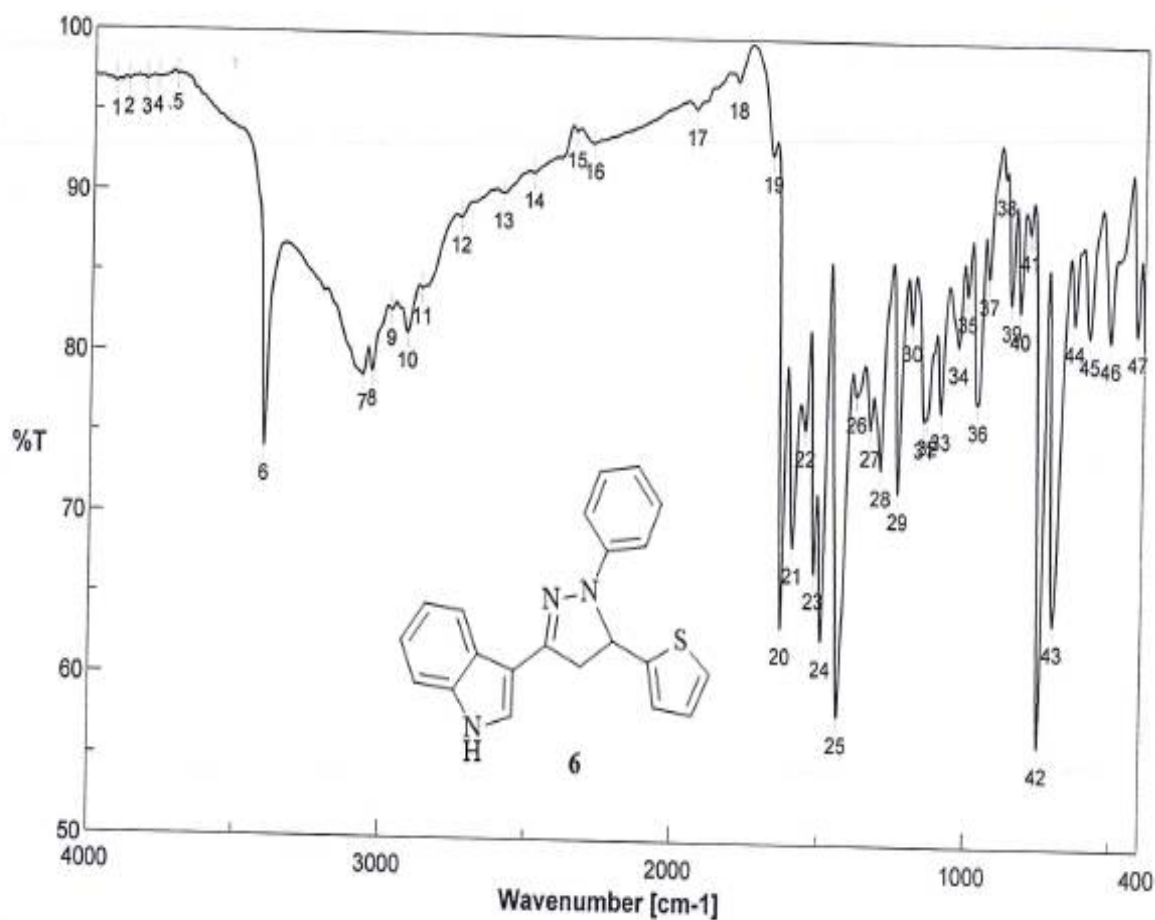

|                |                   |
|----------------|-------------------|
| Accumulation   | 16                |
| Resolution     | 4 cm-1            |
| Zero Filling   | ON                |
| Apodization    | Cosine            |
| Gain           | Auto (2)          |
| Scanning Speed | Auto (2 mm/sec)   |
| Date/Time      | 10/20/2020 0:43PM |
| Update         | 10/20/2020 0:44PM |
| Operator       |                   |
| File Name      | Memory#140        |
| Sample Name    | W7                |
| Comment        |                   |

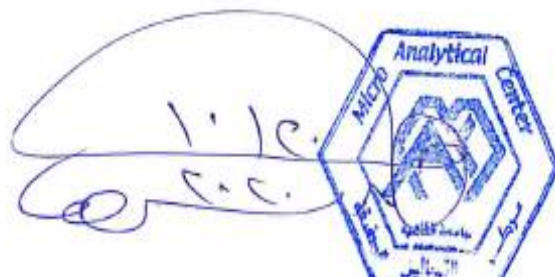

**IR spectrum for compound 6**



Abdu0thman-W7-DMSO-H1

Archive directory: /export/home/vnmr1/vnmrsys/data  
Sample directory: DD5mm\_test\_12Mar2014-21:34:40  
File: PROTON

Pulse Sequence: s2pu1

Solvent: DMSO  
Temp. 30.0 C / 303.1 K  
Mercury-300BB "NMR300"

Relax. delay 6.000 sec  
Pulse 45.0 degrees  
Acq. time 4.000 sec  
Width 6600.7 Hz  
8 repetitions  
OBSERVE H1, 300.0687874 MHz  
DATA PROCESSING  
Line broadening 0.5 Hz  
FT size 65536  
Total time 58 min, 55 sec  
Date: Oct 28 2020

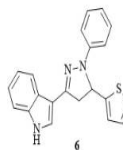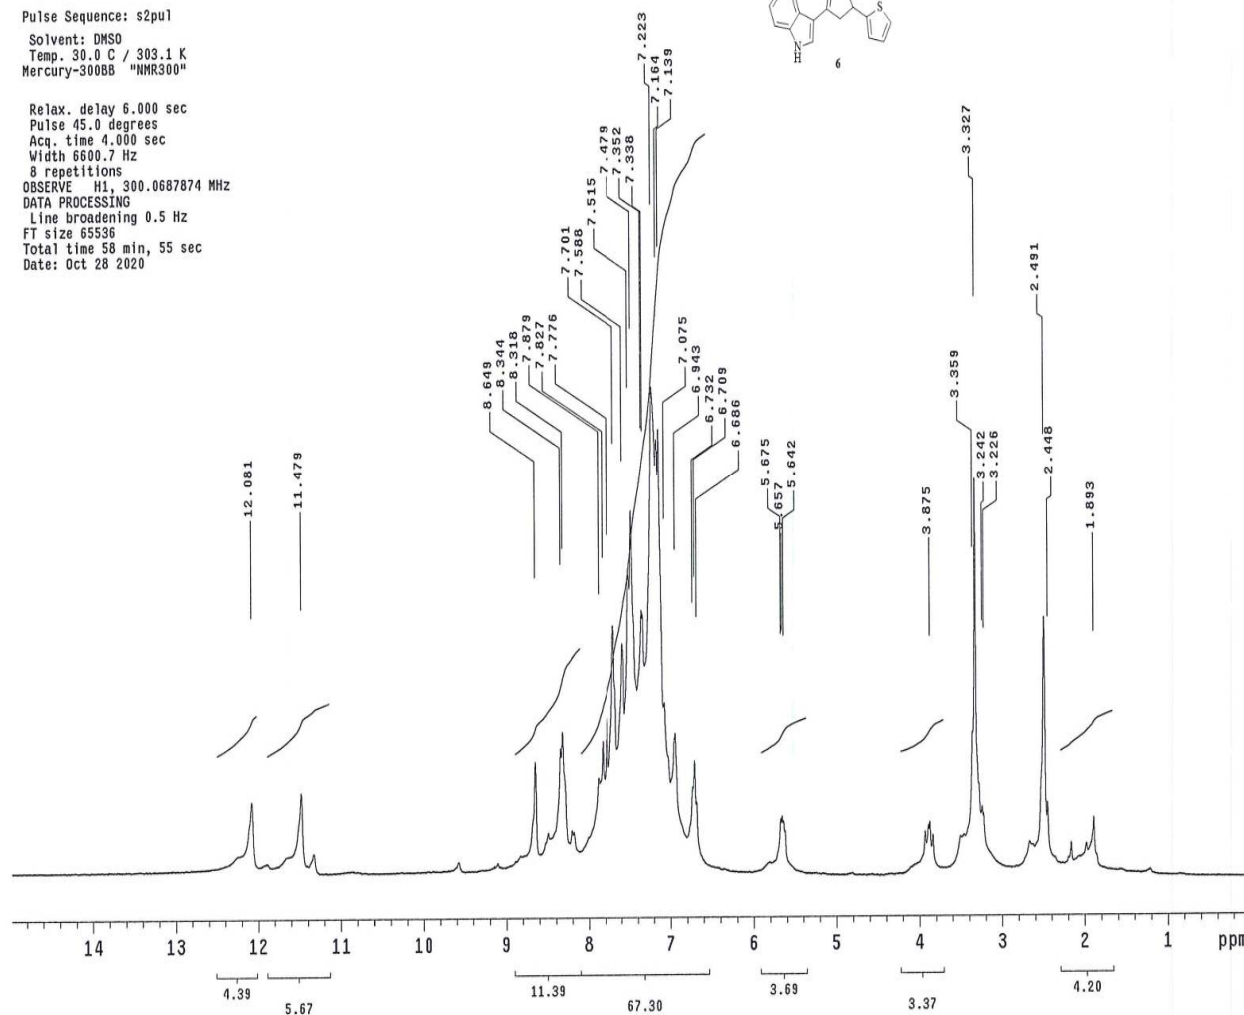

**$^1\text{H}$ -NMR spectrum for compound 6**

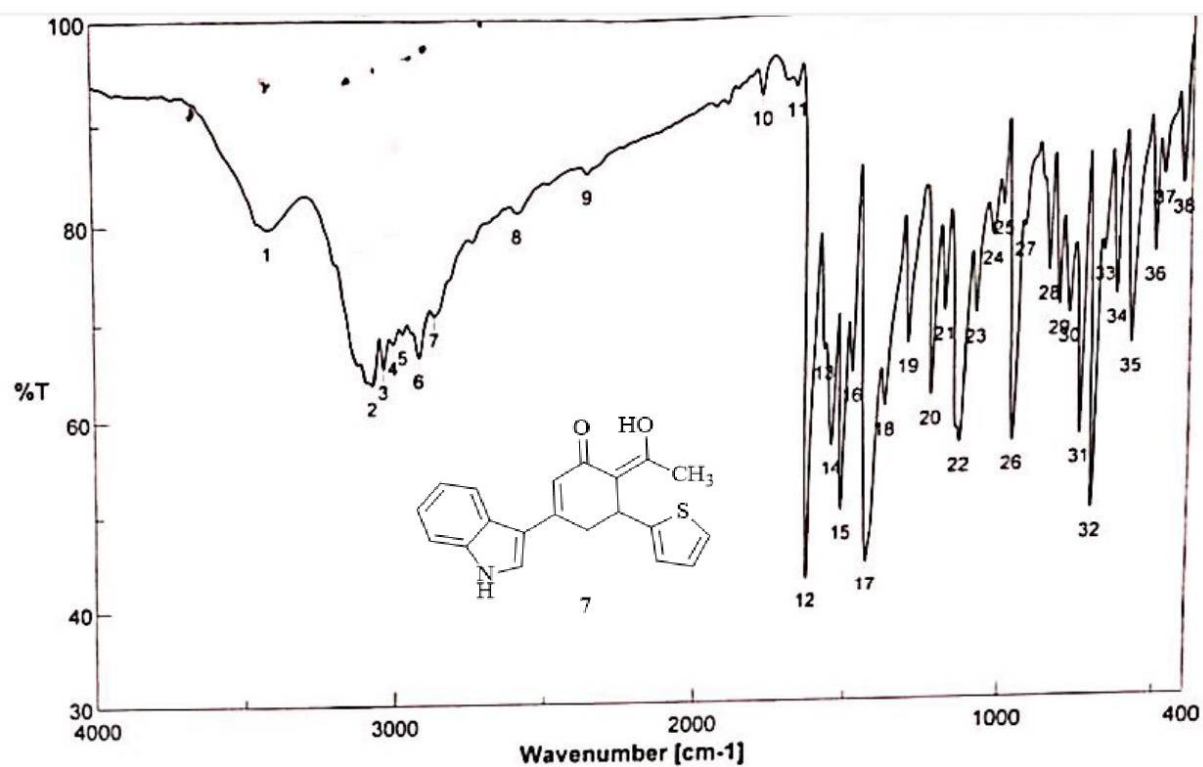

|                |                    |
|----------------|--------------------|
| Accumulation   | 16                 |
| Resolution     | 4 cm <sup>-1</sup> |
| Zero Filling   | ON                 |
| Apodization    | Cosine             |
| Gain           | Auto (4)           |
| Scanning Speed | Auto (2 mm/sec)    |
| Date/Time      | 1/13/2021 10:03AM  |
| Update         | 1/13/2021 10:05AM  |
| Operator       |                    |
| File Name      | Memory#34          |
| Sample Name    | w8                 |
| Comment        |                    |

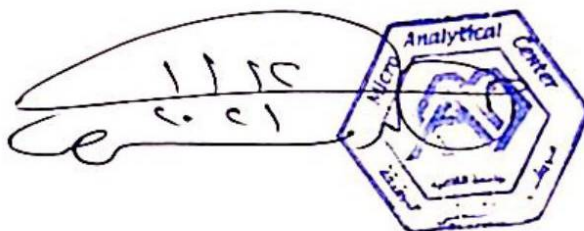

**IR spectrum for compound 7**

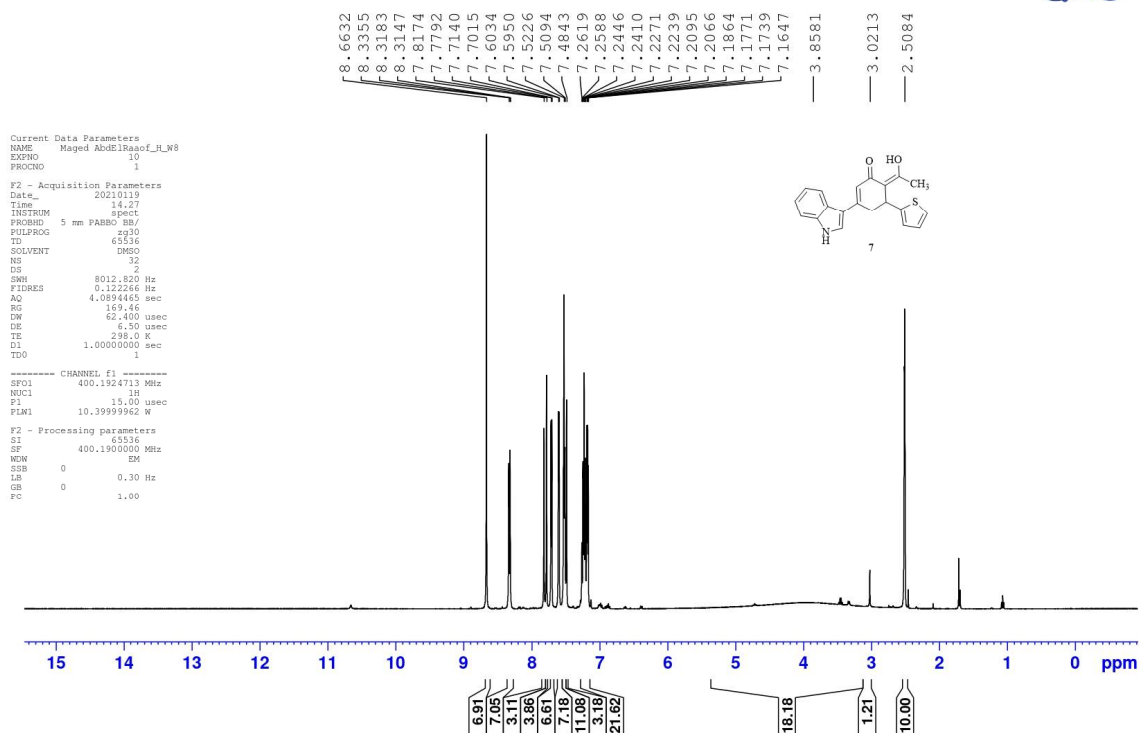

**<sup>1</sup>H-NMR spectrum for compound 7**

23-Jan-07

# Cairo University Micro Analytical Center

## DI Analysis Shimadzu Qp-2010 Plus

Sample Information  
 Analyzed by : Dr. Mai Younis  
 Analyzed : 23/01/2007 07:20:40  
 Sample Name : W7  
 Sample ID :  
 Customer Name : Dr. Abdou Othman - Science - Cairo  
 Data File : C:\GCMSsolution\Data\Project1\W7..QGD  
 Org Data File : C:\GCMSsolution\Data\Project1\W7..QGD  
 Method File : C:\GCMSsolution\Data\Project1\High Temperature Op  
 Org Method File : C:\GCMSsolution\Data\Project1\High Temperature Op  
 Report File :  
 Tuning File : C:\GCMSsolution\System\Tune1\\_default.qgt  
 SEndfsmModified by : Dr. Mai Younis  
 Modified : 23/01/2007 07:27:13

Method  
 Analytical Line 1  
 IonSourceTemp : 250.00 °C  
 [MS Table]  
 --Group 1 - Event 1--  
 Start Time : 0.00min  
 End Time : 10.00min  
 ACQ Mode : Scan  
 Event Time : 0.50sec  
 Scan Speed : 1000  
 Start m/z : 50.00  
 End m/z : 500.00  
 Electron Voltage : 70 eV  
 Ionization Mode : EI

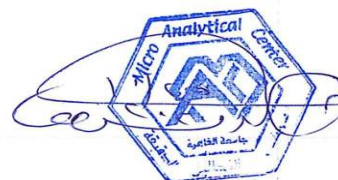

C:\GCMSsolution\Data\Project1\W7..QGD

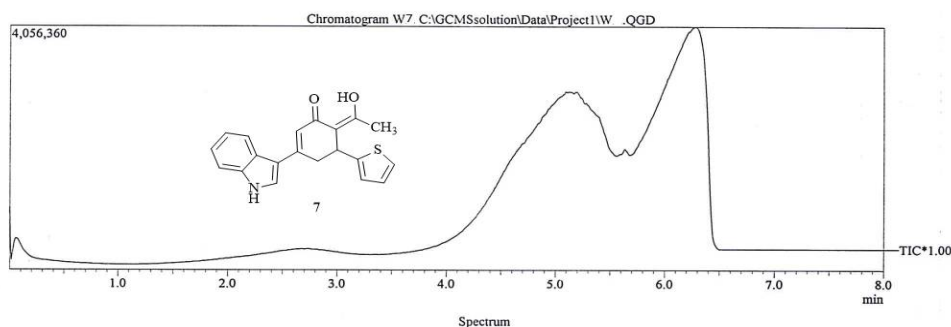

Line#:1 R.Time:5.2(Scan#:619)  
 MassPeaks:216  
 RawMode:Single 5.2(619) BasePeak:253(271556)  
 BG Mode:None Group 1 - Event 1

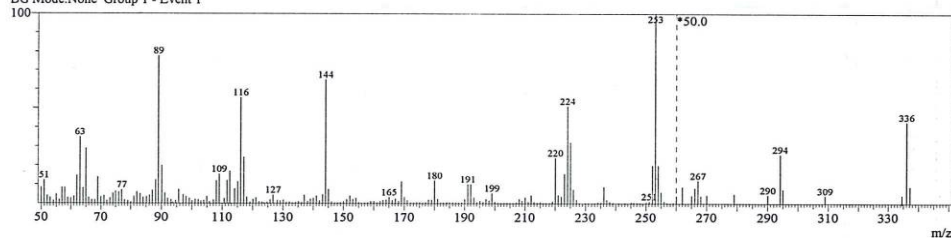

Mass Table  
 Line#:1 R.Time:5.2(Scan#:619)  
 MassPeaks:216  
 RawMode:Single 5.2(619) BasePeak:253(271556)  
 BG Mode:None Group 1 - Event 1

| # | m/z   | Abs. In | Rel. Int. | # | m/z   | Abs. In | Rel. Int. | # | m/z   | Abs. In | Rel. Int. |
|---|-------|---------|-----------|---|-------|---------|-----------|---|-------|---------|-----------|
| 1 | 50.00 | 22758   | 8.38      | 4 | 53.00 | 8134    | 3.00      | 7 | 56.05 | 4803    | 1.77      |
| 2 | 51.00 | 32999   | 12.15     | 5 | 54.05 | 3631    | 1.34      | 8 | 57.05 | 22669   | 8.35      |
| 3 | 52.05 | 11053   | 4.07      | 6 | 55.05 | 12778   | 4.71      | 9 | 58.00 | 22407   | 8.25      |

## Mass spectrum for compound 7

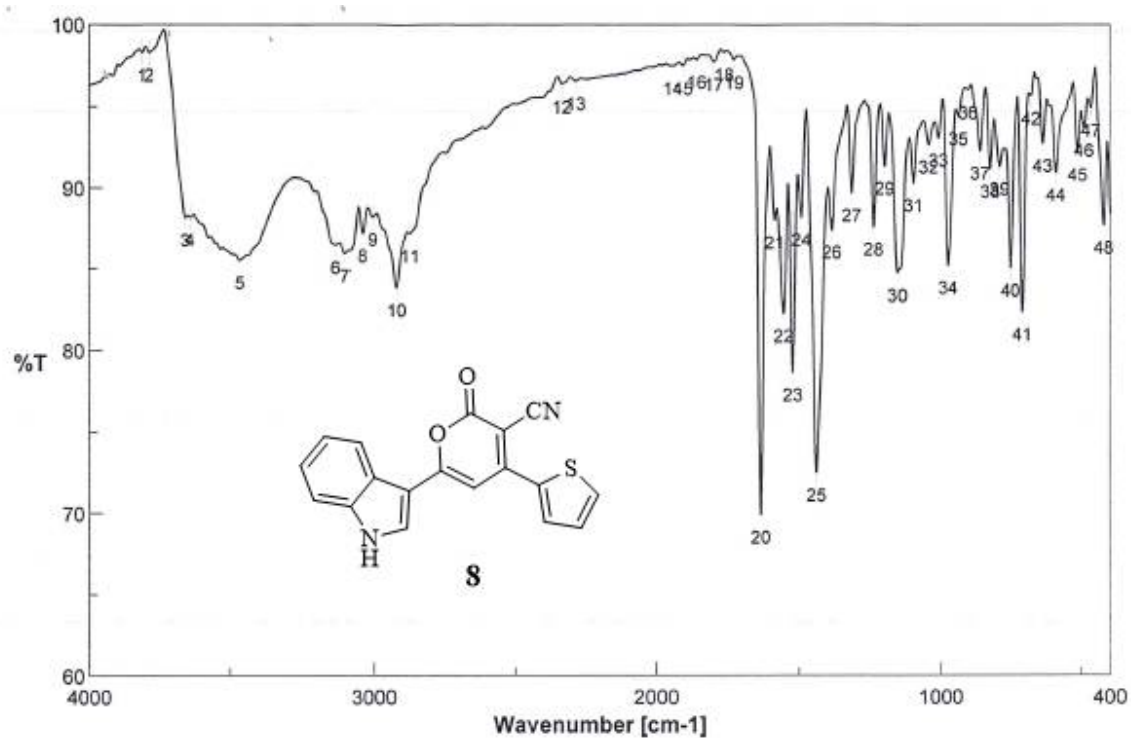

|                |                    |
|----------------|--------------------|
| Accumulation   | 16                 |
| Resolution     | 4 cm <sup>-1</sup> |
| Zero Filling   | ON                 |
| Apodization    | Cosine             |
| Gain           | Auto (8)           |
| Scanning Speed | Auto (2 mm/sec)    |
| Date/Time      | 8/27/2020 11:05AM  |
| Update         | 8/27/2020 11:08AM  |
| Operator       | IR                 |
| File Name      | Memory#52          |
| Sample Name    | W2                 |
| Comment        |                    |

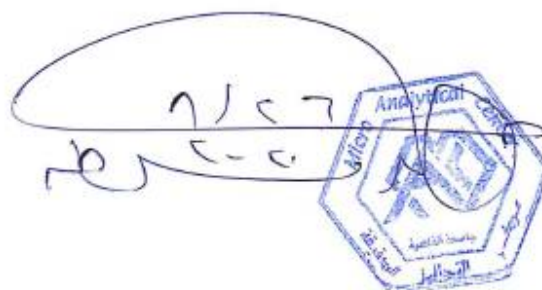

**IR spectrum for compound 8**

AbduOthman-W2-DMSO-H1

Archive directory: /export/home/vnmr1/vnmrsys/data  
Sample directory: DMSO\_test\_12Mar2014-21:34:40  
File: PROTON

Pulse Sequence: s2pu1

Solvent: DMSO  
Temp. 30.0 C / 303.1 K  
Mercury-300BB "NMR300"

Relax. delay 5.000 sec  
Pulse 45.0 degrees  
Acq. time 4.000 sec  
Width 6600.7 Hz  
4 repetitions  
OBSERVE H1, 300.0687874 MHz  
DATA PROCESSING  
Line broadening 0.1 Hz  
FT size 65536  
Total time 50 min, 55 sec  
Date: Oct 28 2020

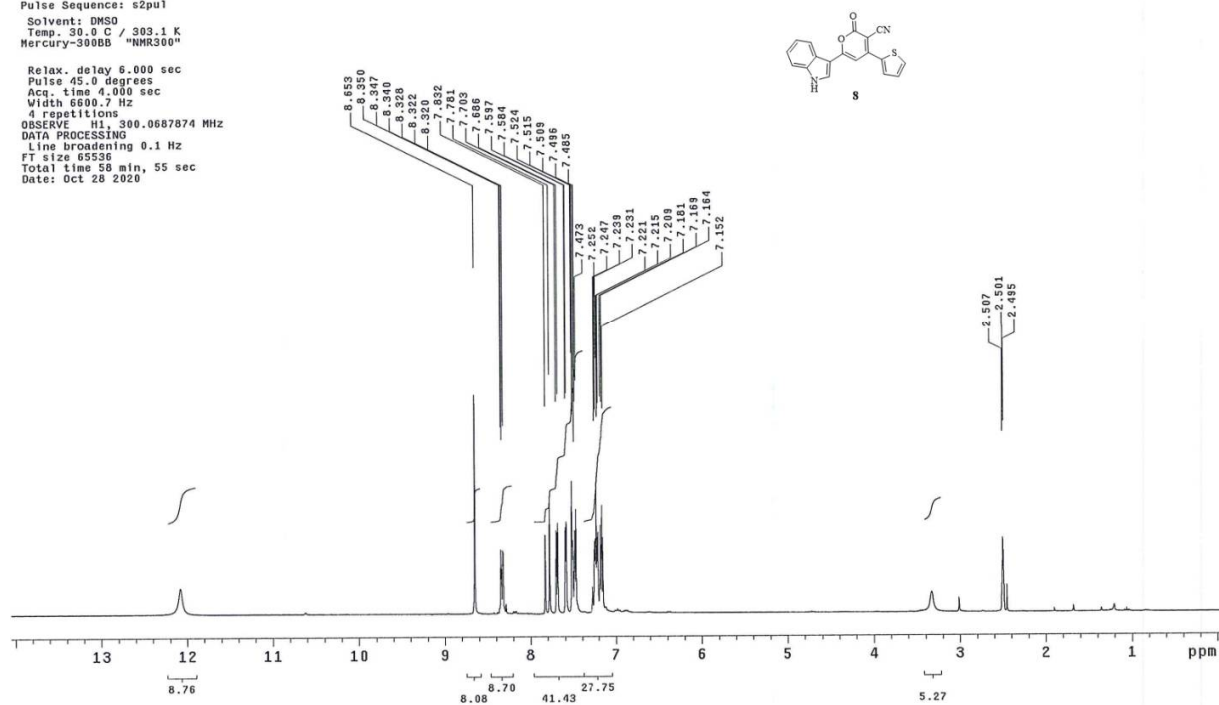

**$^1\text{H}$ -NMR spectrum for compound 8**

# Cairo University Micro Analytical Center

## DI Analysis Shimadzu Qp-2010 Plus

Sample Information  
 Analyzed by : Dr. Mai Younis  
 Analyzed : 05/02/2007 04:51:16  
 Sample Name : W8  
 Sample ID :  
 Customer Name : Dr. Maged abdelraaof - Science - Zagazik  
 Data File : C:\GCMSsolution\Data\Project1\W8 .QGD  
 Org Data File : C:\GCMSsolution\Data\Project1\W8 .QGD  
 Method File : C:\GCMSsolution\Data\Project1\High Temperature Op  
 Org Method File : C:\GCMSsolution\Data\Project1\High Temperature Op  
 Report File :  
 Tuning File : C:\GCMSsolution\System\Tune1\ default.qgt  
 SEndIfSModified by : Dr. Mai Younis  
 Modified : 05/02/2007 04:58:34

### Method

Analytical Line 1  
 IonSourceTemp : 250.00 °C  
 [MS Table]  
 --Group 1 - Event 1--  
 Start Time : 0.00min  
 End Time : 10.00min  
 ACQ Mode : Scan  
 Event Time : 0.50sec  
 Scan Speed : 1000  
 Start m/z : 50.00  
 End m/z : 500.00

Electron Voltage : 70 eV  
 Ionization Mode : EI

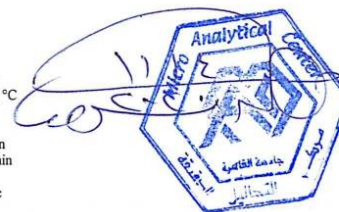

C:\GCMSsolution\Data\Project1\W8 .QGD

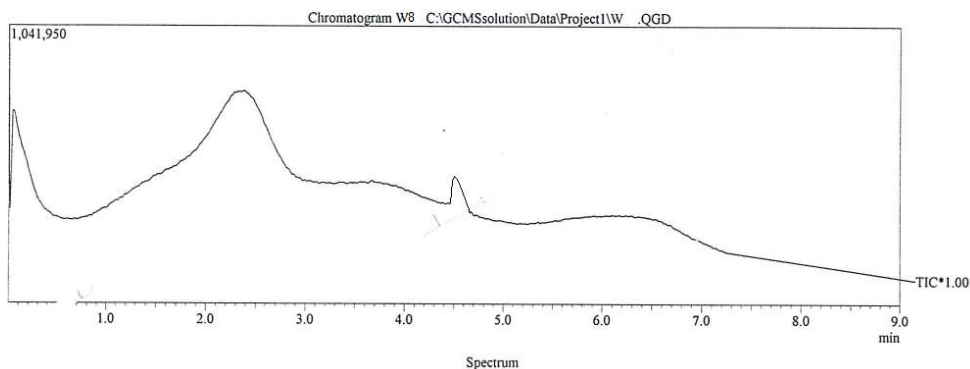

Line#:1 R.Time:6.0(Scan#:724)  
 MassPeaks:227  
 RawMode:Single 6.0(724) BasePeak:57(15103)  
 BG Mode:None Group 1 - Event 1

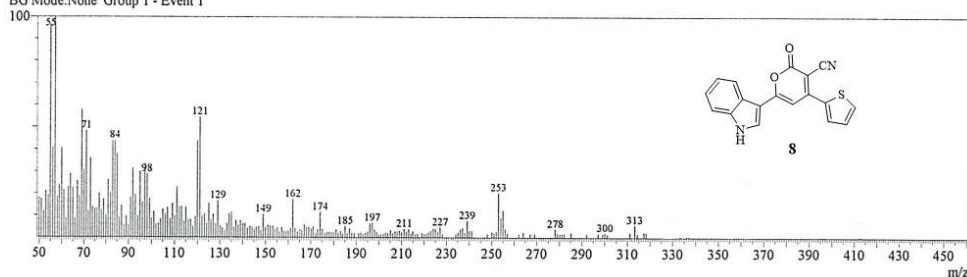

## Mass spectrum for compound 9

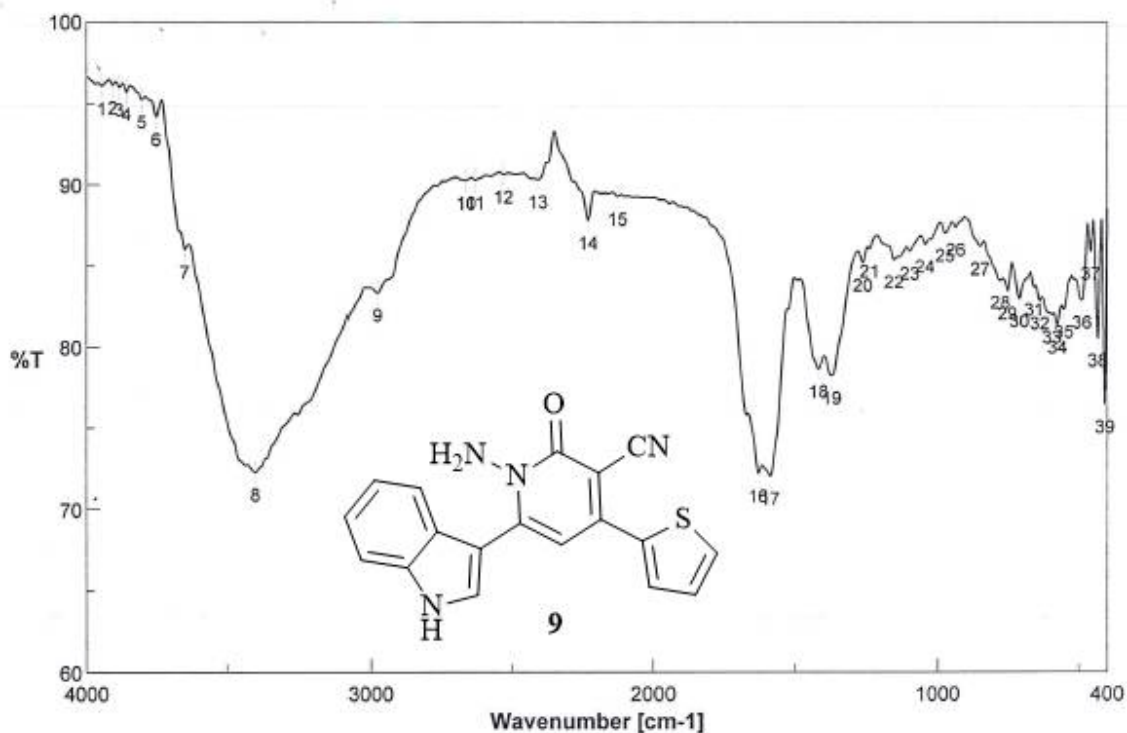

|                |                    |
|----------------|--------------------|
| Accumulation   | 16                 |
| Resolution     | 4 cm <sup>-1</sup> |
| Zero Filling   | ON                 |
| Apodization    | Cosine             |
| Gain           | Auto (16)          |
| Scanning Speed | Auto (2 mm/sec)    |
| Date/Time      | 8/27/2020 11:11AM  |
| Update         | 8/27/2020 11:12AM  |
| Operator       | IR                 |
| File Name      | Memory#64          |
| Sample Name    | W3                 |
| Comment        |                    |

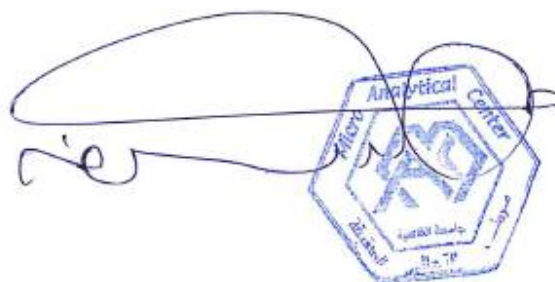

**IR spectrum for compound 9**



# Cairo University Micro Analytical Center

## DI Analysis Shimadzu Qp-2010 Plus

Sample Information  
 Analyzed by : Dr. Mai Younis  
 Analyzed : 05/02/2007 04:51:16  
 Sample Name : W9  
 Sample ID :  
 Customer Name : Dr. Maged abdelraaof - Science - Zagazik  
 Data File : C:\GCMSsolution\Data\Project1\W9 QGD  
 Org Data File : C:\GCMSsolution\Data\Project1\W9 QGD  
 Method File : C:\GCMSsolution\Data\Project1\High Temperature Op  
 Org Method File : C:\GCMSsolution\Data\Project1\High Temperature Op  
 Report File :  
 Tuning File : C:\GCMSsolution\System\Tune1\default.qgt  
 SEndIfSModified by : Dr. Mai Younis  
 Modified : 05/02/2007 04:58:34

### Method

Analytical Line 1  
 IonSourceTemp : 250.00 °C  
 [MS Table]  
 --Group 1 - Event 1--  
 Start Time : 0.00min  
 End Time : 10.00min  
 ACQ Mode : Scan  
 Event Time : 0.50sec  
 Scan Speed : 1000  
 Start m/z : 50.00  
 End m/z : 500.00

Electron Voltage : 70 eV  
 Ionization Mode : EI

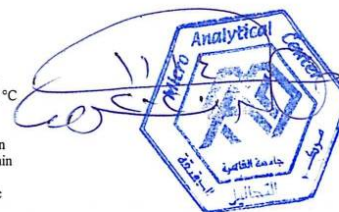

C:\GCMSsolution\Data\Project1\W9 QGD

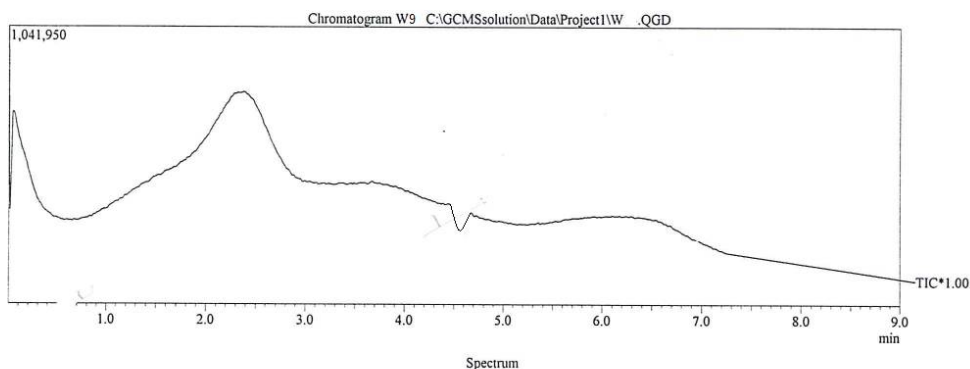

Line#:1 R.Time:6.0(Scan#:724)  
 MassPeaks:227  
 RawMode:Single 6.0(724) BasePeak:57(15103)  
 BG Mode:None Group 1 - Event 1

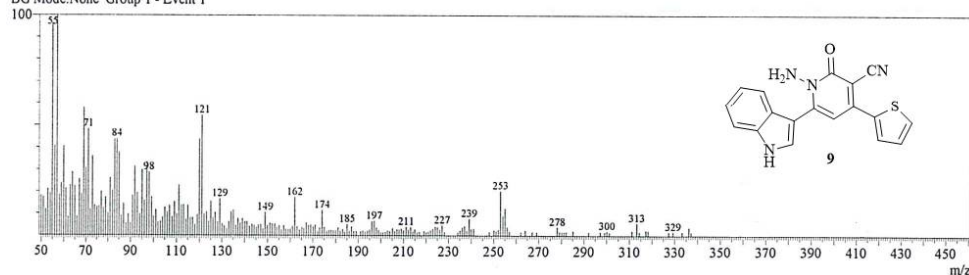

**Mass spectrum for compound 9**

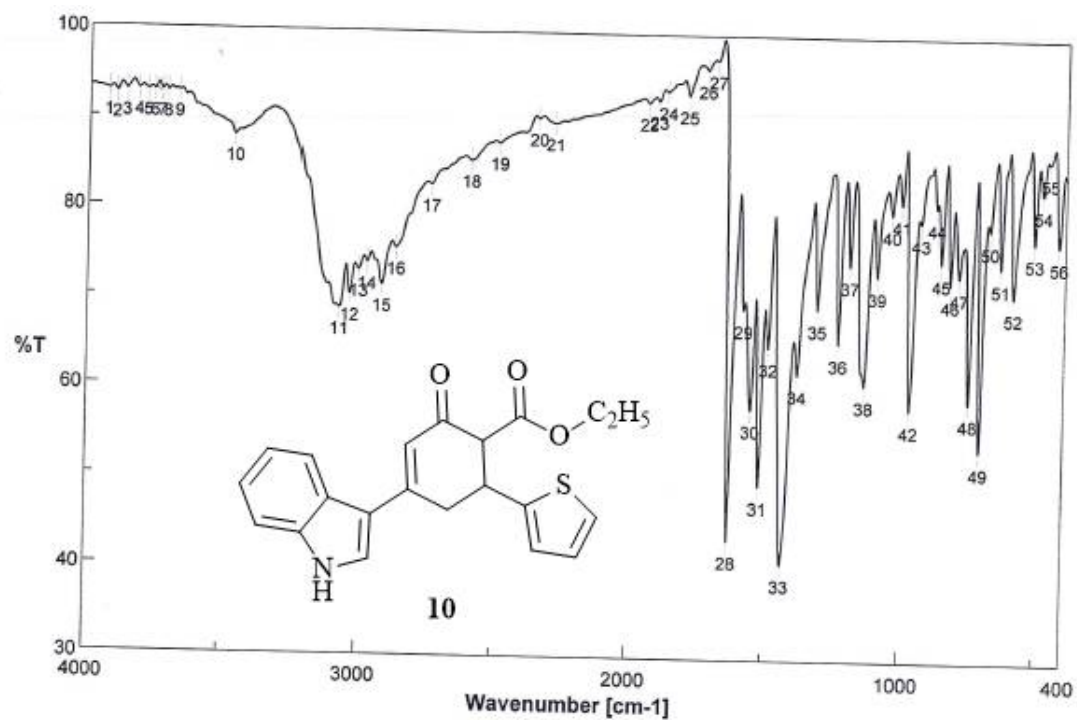

|                |                   |
|----------------|-------------------|
| Accumulation   | 16                |
| Resolution     | 4 cm-1            |
| Zero Filling   | ON                |
| Apodization    | Cosine            |
| Gain           | Auto (2)          |
| Scanning Speed | Auto (2 mm/sec)   |
| Date/Time      | 10/20/2020 0:42PM |
| Update         | 10/20/2020 0:42PM |
| Operator       |                   |
| File Name      | Memory#135        |
| Sample Name    | W9                |
| Comment        |                   |

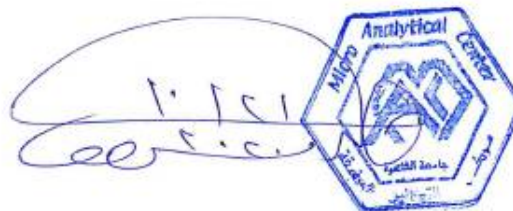

**IR spectrum for compound 10**

Abdu0thman-V9-DM50-H1

Archive directory: /export/home/vnmr1/vnmrsys/data  
Sample directory: DD5mm\_test\_12Mar2014-21:34:40  
File: PROTON

Pulse Sequence: szpul

Solvent: DMSO  
Temp: 30.0 C / 303.1 K  
Mercury-300BB <sup>1</sup>H NMR300

Relax. delay 6.000 sec  
Pulse 45.0 degrees  
Acq. time 4.000 sec  
Width 6500.7 Hz  
5 repetitions  
OBSERVE H1, 300.0607674 MHz  
DATA PROCESSING  
Line broadening 0.1 Hz  
FT size 65536  
Total time 50 min, 55 sec  
Date: Oct 28 2020

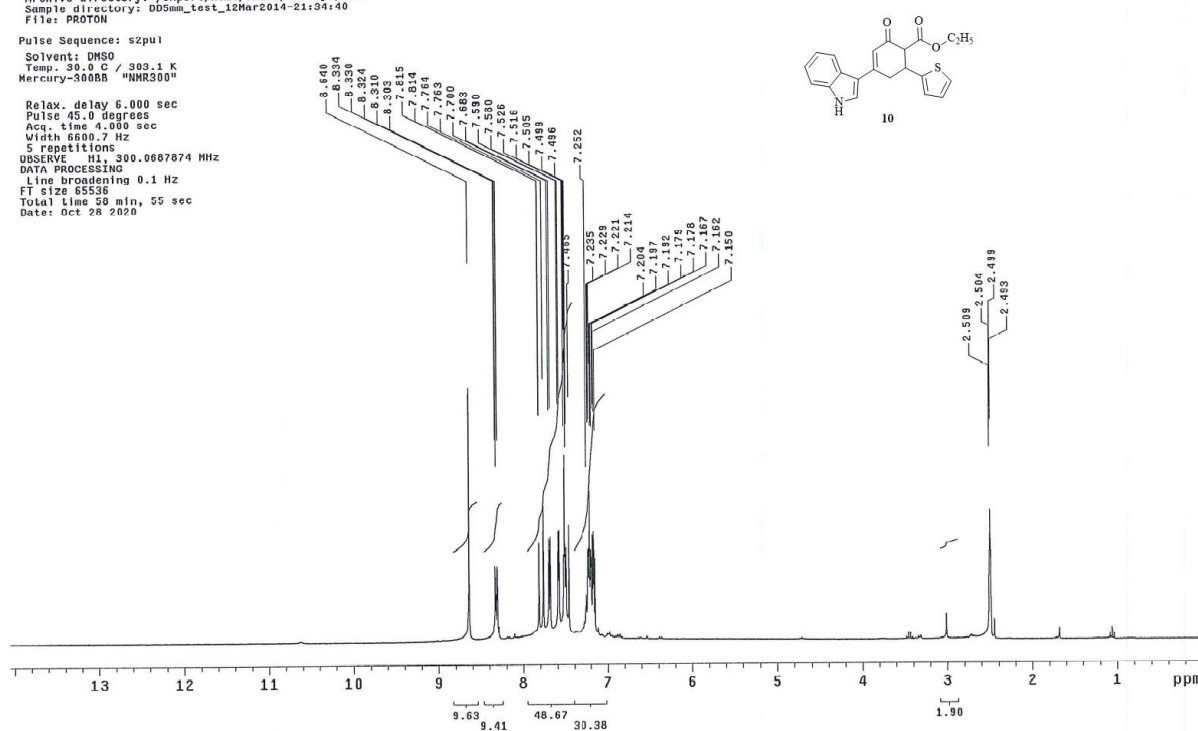

**<sup>1</sup>H-NMR spectrum for compound 10**

# Cairo University Micro Analytical Center

## DI Analysis Shimadzu Qp-2010 Plus

Sample Information  
 Analyzed by : Dr. Mai Younis  
 Analyzed : 05/02/2007 04:51:16  
 Sample Name : W10  
 Sample ID :  
 Customer Name : Dr. Maged abdelraaof - Science - Zagazik  
 Data File : C:\GCMSsolution\Data\Project1\W10.QGD  
 Org Data File : C:\GCMSsolution\Data\Project1\W10.QGD  
 Method File : C:\GCMSsolution\Data\Project1\High Temperature Op  
 Org Method File : C:\GCMSsolution\Data\Project1\High Temperature Op  
 Report File :  
 Tuning File : C:\GCMSsolution\System\Tune1\default.qgt  
 SEndIfSModified by : Dr. Mai Younis  
 Modified : 05/02/2007 04:58:34

### Method

Analytical Line 1  
 IonSourceTemp : 250.00 °C  
 [MS Table]  
 --Group 1 - Event 1--  
 Start Time : 0.00min  
 End Time : 10.00min  
 ACQ Mode : Scan  
 Event Time : 0.50sec  
 Scan Speed : 1000  
 Start m/z : 50.00  
 End m/z : 500.00

Electron Voltage : 70 eV  
 Ionization Mode : EI

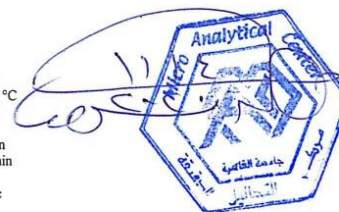

C:\GCMSsolution\Data\Project1\W10.QGD

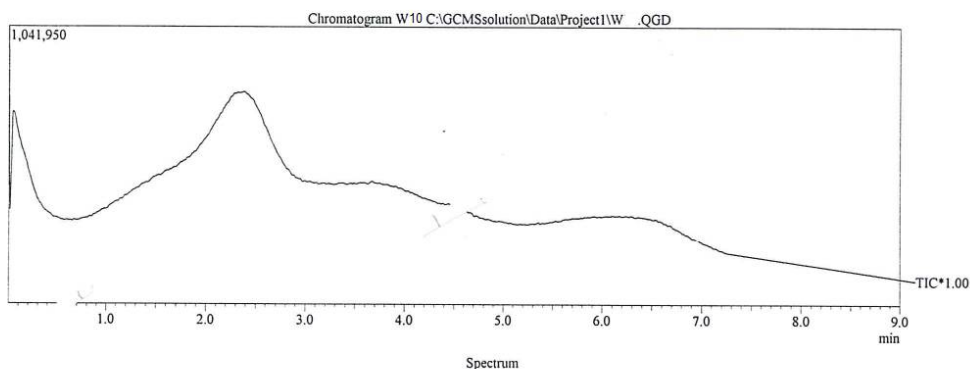

Line#:1 R.Time:6.0(Scan#:724)  
 MassPeaks:227  
 RawMode:Single 6.0(724) BasePeak:57(15103)  
 BG Mode:None Group 1 - Event 1

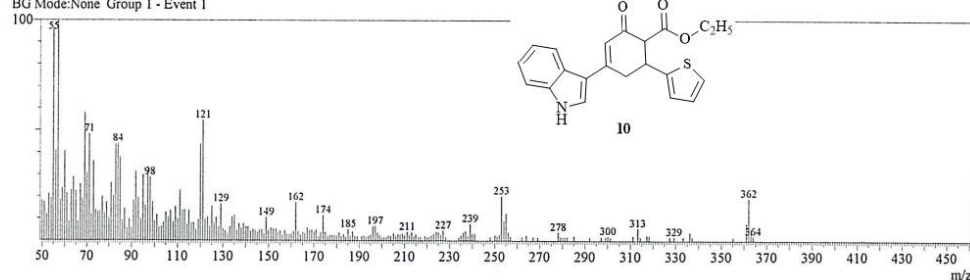

**Mass spectrum for compound 10**

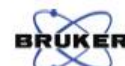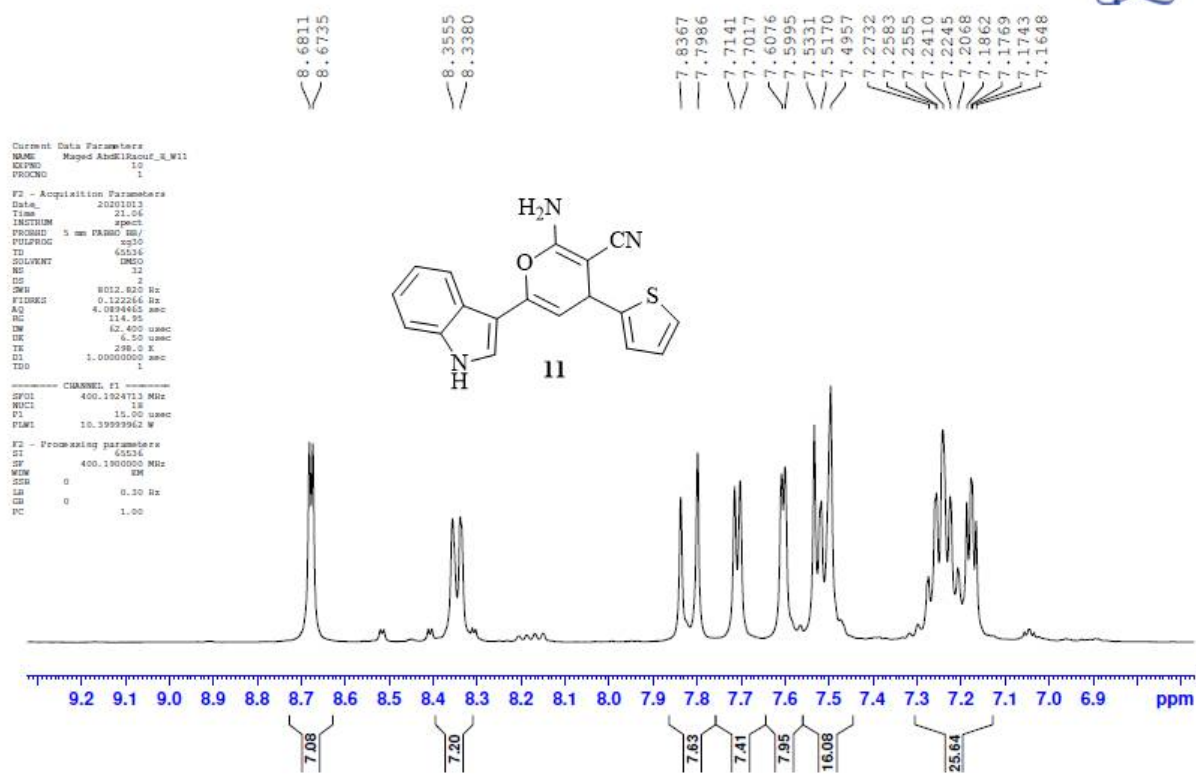

<sup>1</sup>H-NMR spectrum for compound 11

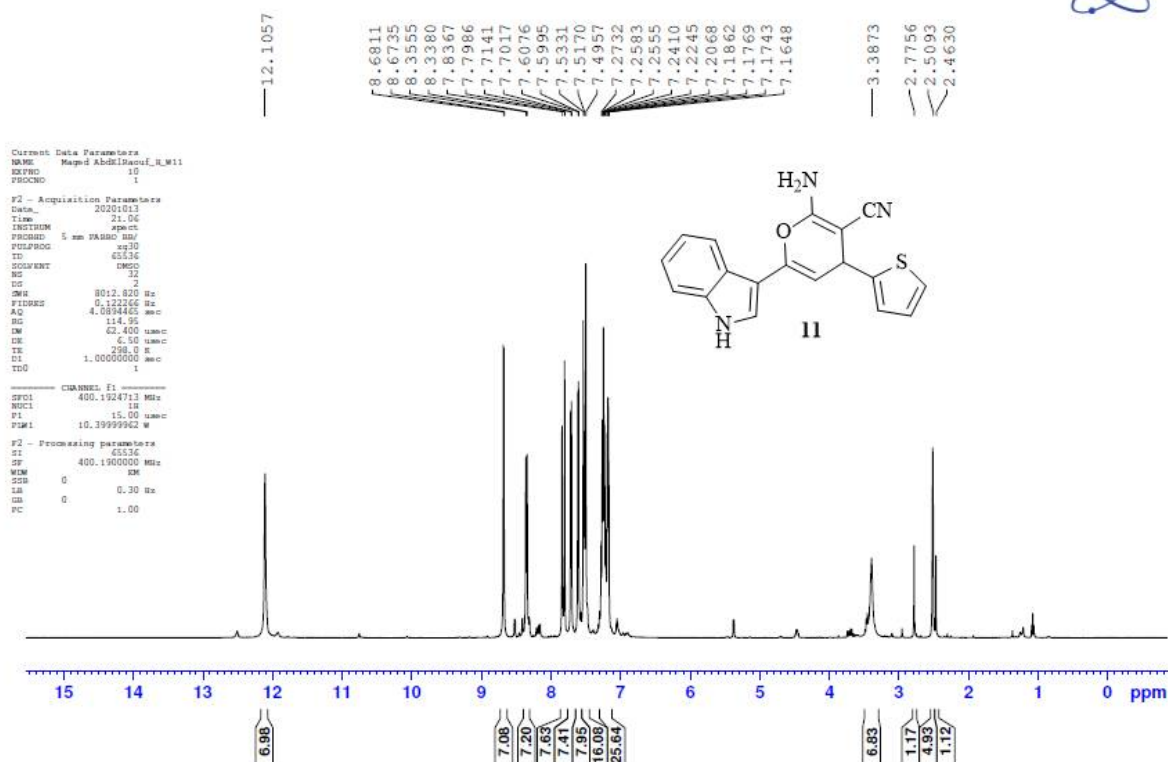

**<sup>1</sup>H-NMR spectrum for compound 11**

Current Data Parameters  
NAME Maged AbdElRaouf\_H\_W1\_020  
EXPNO 10  
PROCNO 1

F2 - Acquisition Parameters  
Date\_ 20201013  
Time 13.14  
INSTRUM spect  
PROBHD 5 mm QNP1H1H  
PULPROG zgpg30  
TD 65536  
SOLVENT DMSO  
NS 32  
DS 2  
SWH 8012.820 Hz  
FIDRES 0.122266 Hz  
AQ 4.588461 sec  
RG 64.31  
RW 62.400 umsec  
DE 6.50 umsec  
TE 298.1 K  
D1 1.00000000 sec  
TDO 1

===== CHANNEL f1 =====  
NUC1 1H  
P1 15.00 umsec  
PL1 0.00 dB  
F2 - Processing parameters  
SI 65536  
SF 400.1460000 MHz  
WDW EM  
SSB 0  
LB 0.30 Hz  
GB 0  
PC 1.00

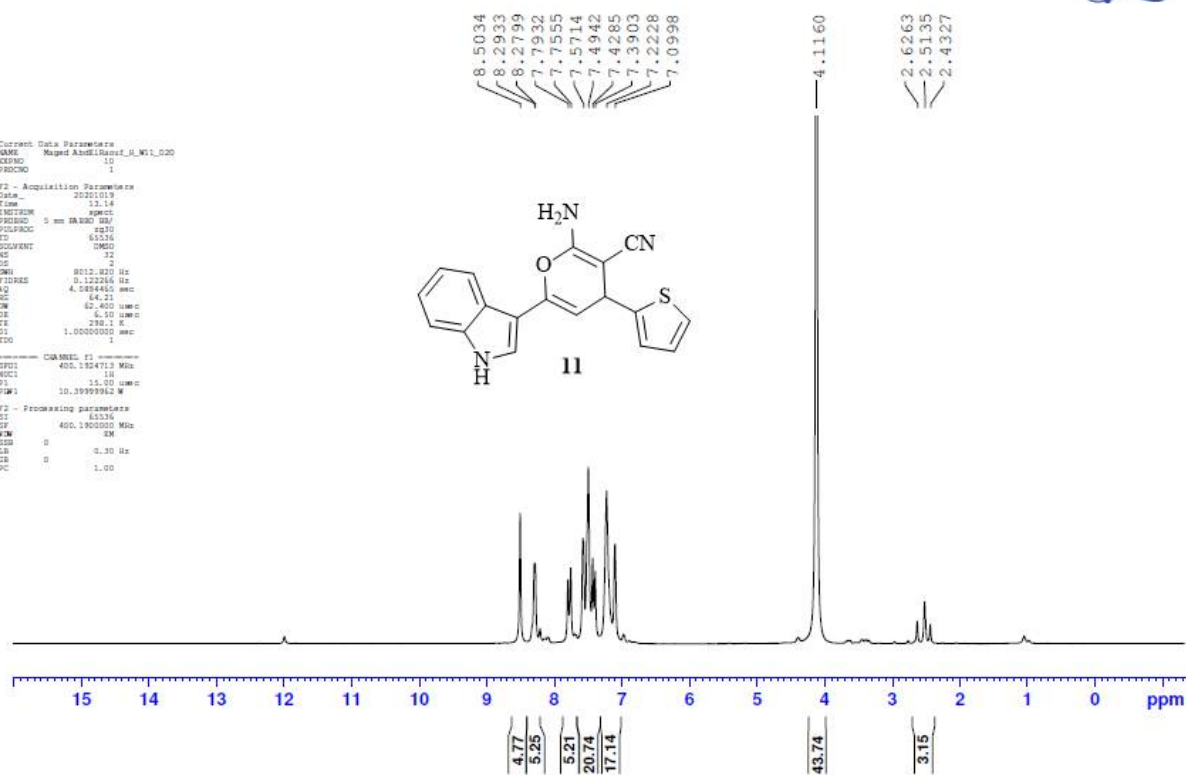

<sup>1</sup>H-NMR (D<sub>2</sub>O) spectrum for compound 11

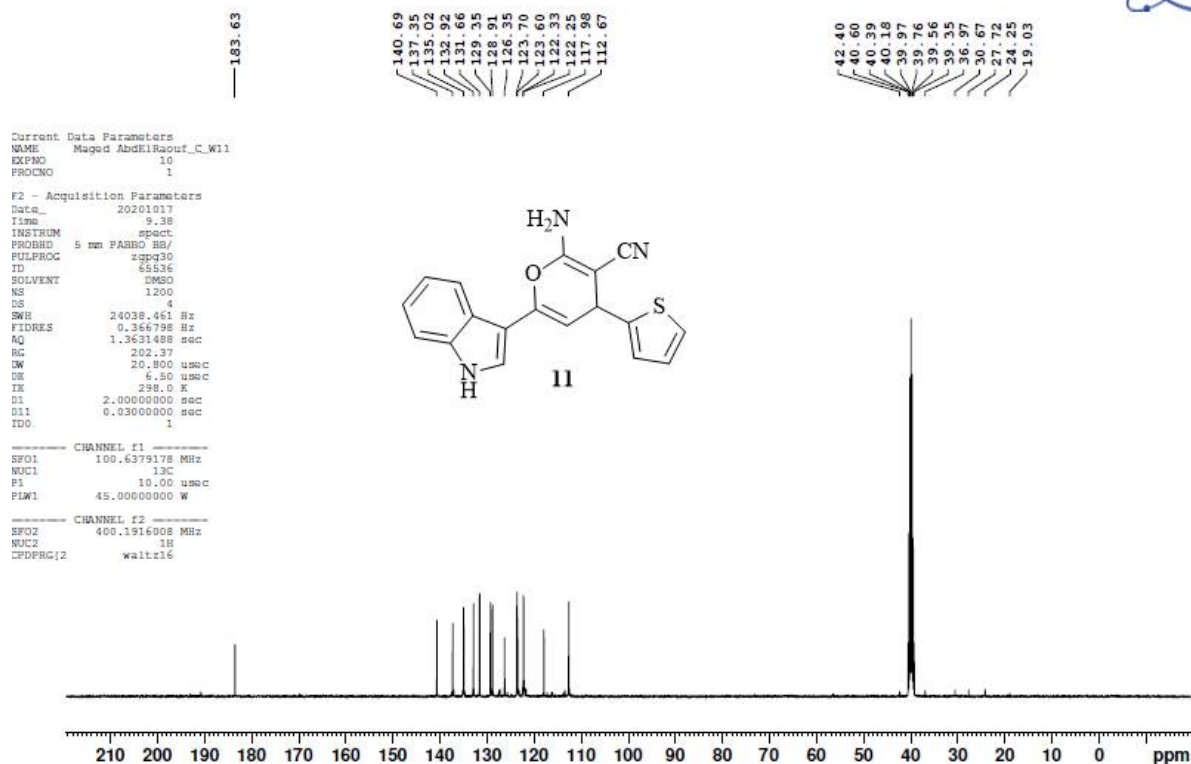

**<sup>13</sup>C-NMR spectrum for compound 11**



Maged AbdElRaouf\_C\_ 11

Microanalytical Unit - FOPCU - NMR laboratory  
www.pharma.cu.edu.eg dir-mau.fopcu@pharma.cu.edu.eg

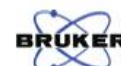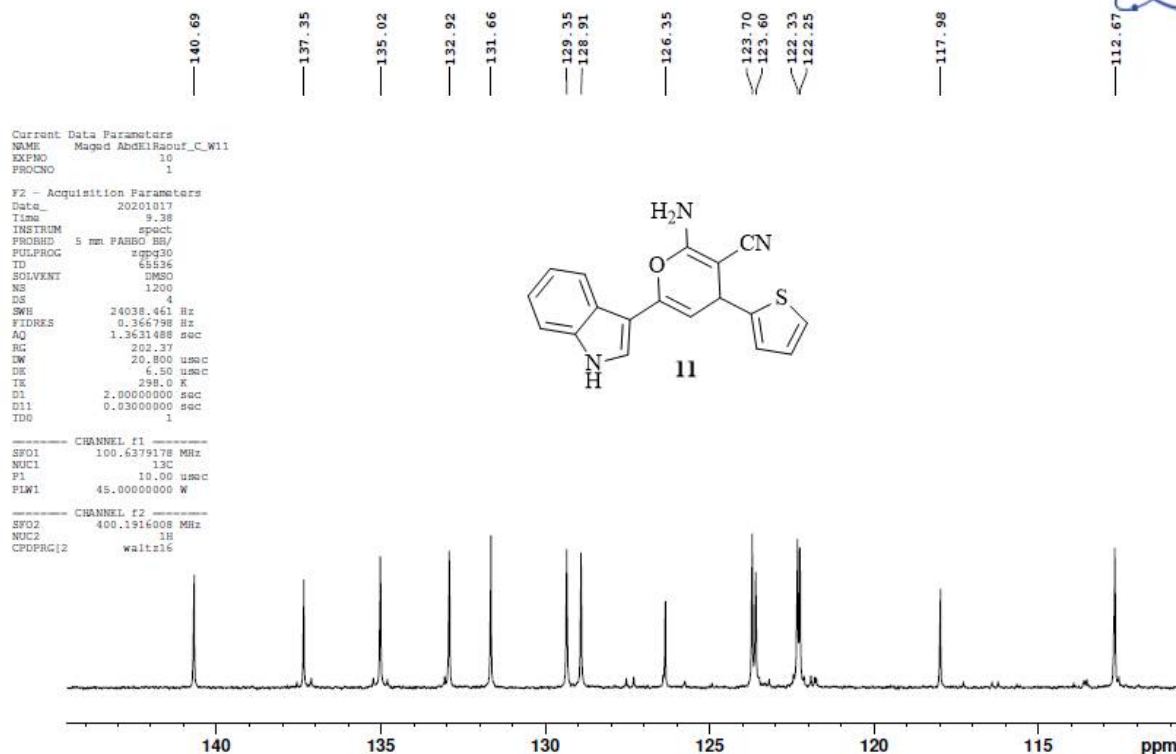

**<sup>13</sup>C-NMR spectrum for compound 11**

# Cairo University Micro Analytical Center

## DI Analysis Shimadzu Qp-2010 Plus

Sample Information  
 Analyzed by : Dr. Mai Younis  
 Analyzed : 05/02/2007 04:51:16  
 Sample Name : W11  
 Sample ID :  
 Customer Name : Dr. Maged abdelraaof - Science - Zagazik  
 Data File : C:\GCMSsolution\Data\Project1\W11.QGD  
 Org Data File : C:\GCMSsolution\Data\Project1\W11.QGD  
 Method File : C:\GCMSsolution\Data\Project1\High Temperature Op  
 Org Method File : C:\GCMSsolution\Data\Project1\High Temperature Op  
 Report File :  
 Tuning File : C:\GCMSsolution\System\Tune1\default.qgt  
 SEndIfSModified by : Dr. Mai Younis  
 Modified : 05/02/2007 04:58:34

### Method

Analytical Line 1  
 IonSourceTemp : 250.00 °C  
 [MS Table]  
 --Group 1 - Event 1--  
 Start Time : 0.00min  
 End Time : 10.00min  
 ACQ Mode : Scan  
 Event Time : 0.50sec  
 Scan Speed : 1000  
 Start m/z : 50.00  
 End m/z : 500.00

Electron Voltage : 70 eV  
 Ionization Mode : EI



C:\GCMSsolution\Data\Project1\W11.QGD

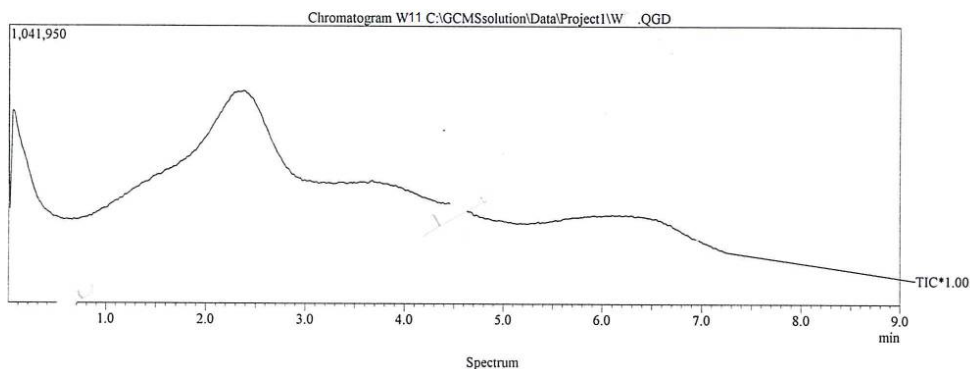

Line#:1 R.Time:6.0(Scan#:724)  
 MassPeaks:227  
 RawMode:Single 6.0(724) BasePeak:57(15103)  
 BG Mode:None Group 1 - Event 1

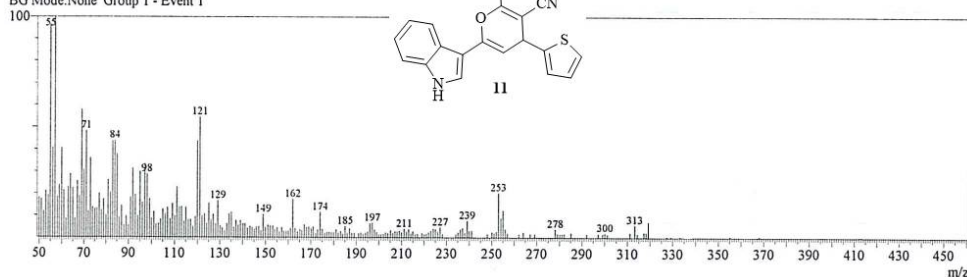

**Mass spectrum for compound 11**

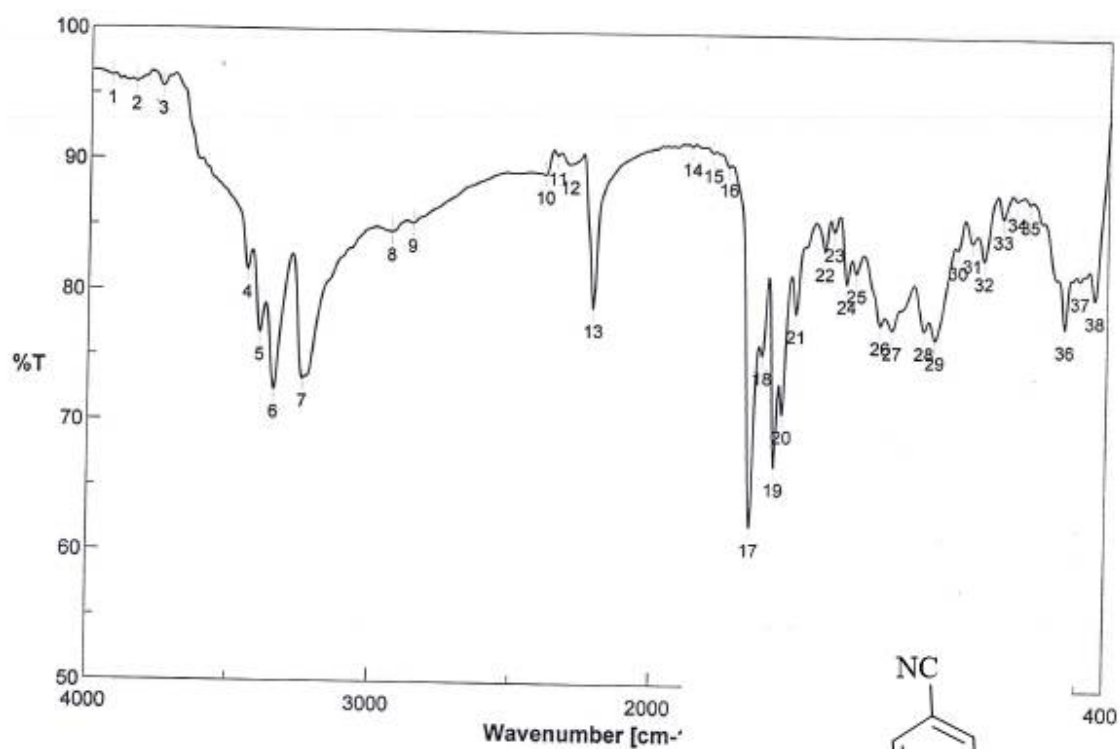

Accumulation 16  
 Resolution 4 cm<sup>-1</sup>  
 Zero Filling ON  
 Apodization Cosine  
 Gain Auto (2)  
 Scanning Speed Auto (2 mm/sec)  
 Date/Time 10/20/2020 0:32PM  
 Update 10/20/2020 0:33PM  
 Operator  
 File Name  
 Sample Name  
 Comment

Memory#108  
 W12

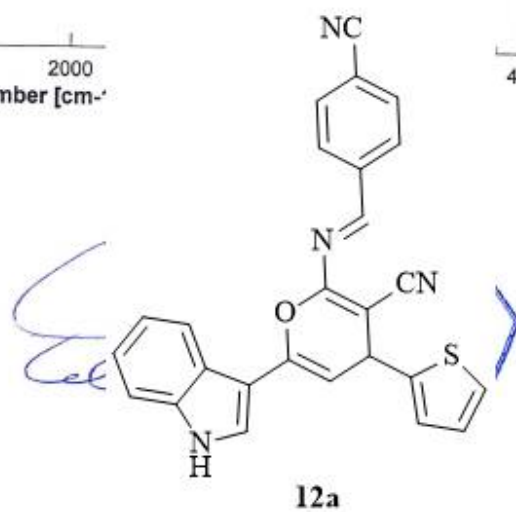

**IR spectrum for compound 12a**

AbduOthman-V8-DMSO-H1

Archive directory: /export/home/vnmr1/vnmrsys/data  
Sample directory: 005mm\_test\_12Mar2014-21:34:40  
File: PROTON

Pulse Sequence: s2pul

Solvent: DMSO  
Temp: 30.0 C / 303.1 K  
Mercury-300SB "NMR300"

Relax. delay 6.000 sec  
Pulse 45.0 degrees  
Acq. time 4.000 sec  
Width 6600.7 Hz  
13 repetitions  
OBSERVE M1 300.6687674 MHz  
DATA PROCESSING  
Line broadening 0.1 Hz  
FT size 65536  
Total time 59 min, 55 sec  
Date: Oct 28 2020

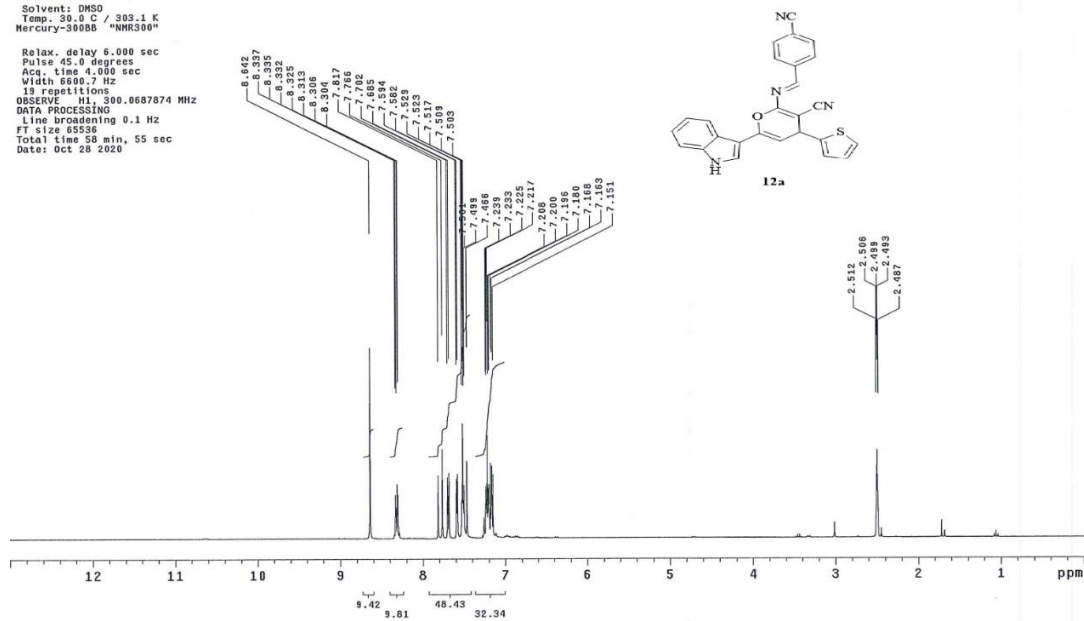

**<sup>1</sup>H-NMR spectrum for compound 12a**

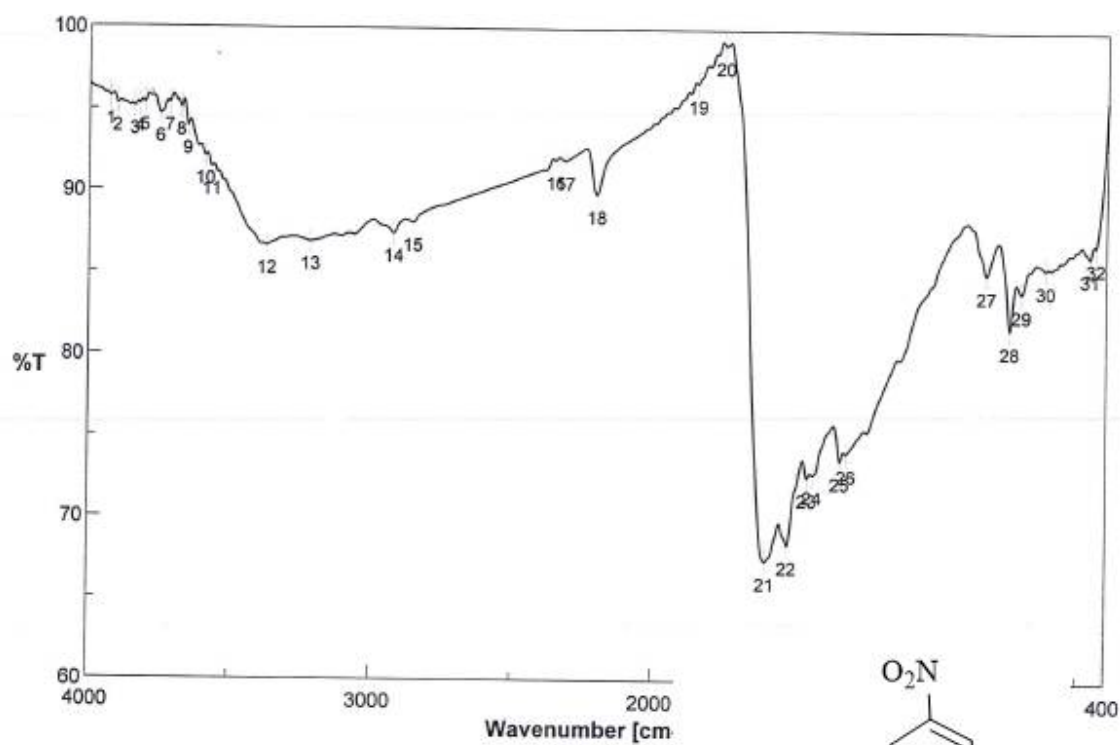

|                |                    |
|----------------|--------------------|
| Accumulation   | 16                 |
| Resolution     | 4 cm <sup>-1</sup> |
| Zero Filling   | ON                 |
| Apodization    | Cosine             |
| Gain           | Auto (2)           |
| Scanning Speed | Auto (2 mm/sec)    |
| Date/Time      | 10/20/2020 0:36PM  |
| Update         | 10/20/2020 0:38PM  |
| Operator       |                    |
| File Name      | Memory#120         |
| Sample Name    | W13                |
| Comment        |                    |

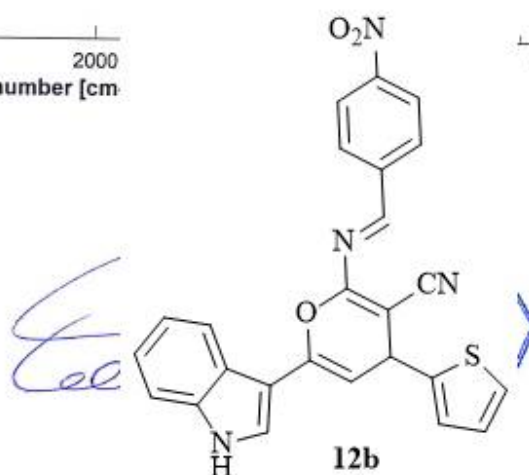

**IR spectrum for compound 12b**

Maged AbdElRaaof\_H\_W12b

Microanalytical Unit - FOPCU - NMR laboratory  
www.pharma.cu.edu.eg dir-mau.fopcu@pharma.cu.edu.eg

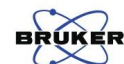

Current Data Parameters  
NAME Maged AbdElRaaof\_H\_W12b  
EXPNO 10  
PROCNO 1  
F2 - Acquisition Parameters  
Date\_ 20210119  
Time 14.32  
INSTRUM spect  
PROBHD 5 mm PABBO BB/  
PULPROG zg30  
TD 65536  
SOLVENT DMSO  
NS 32  
DS 2  
SWH 8012.820 Hz  
FIDRES 0.122256 Hz  
AQ 4.0894465 sec  
RG 202.37  
DM 62.400 usec  
DE 6.50 usec  
TE 298.1 K  
D1 1.00000000 sec  
TD0 1  
===== CHANNEL f1 =====  
SF01 400.1924713 MHz  
NUC1 1H  
P1 15.00 usec  
PLW1 10.39999962 W  
F2 - Processing parameters  
SI 65536  
SF 400.1900000 MHz  
WDW EM  
SSB 0  
LB 0.30 Hz  
GB 0  
PC 1.00

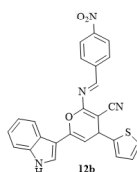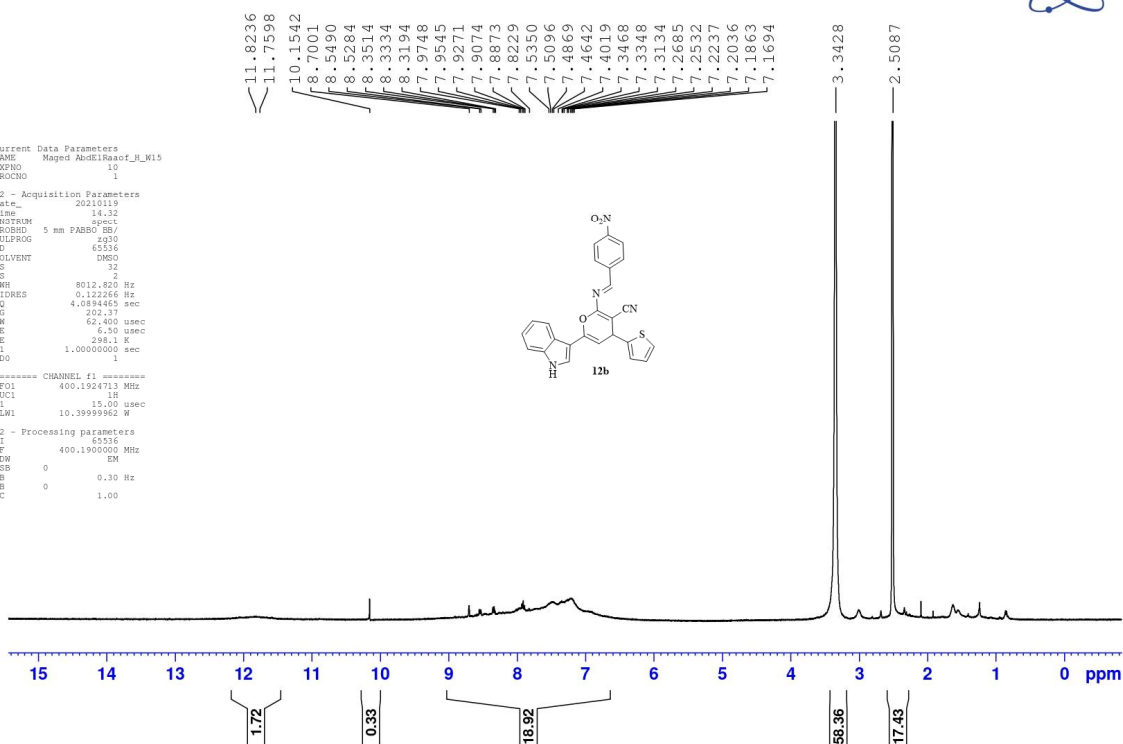

**<sup>1</sup>H-NMR spectrum for compound 12b**

23-Jan-07

# Cairo University Micro Analytical Center

## DI Analysis Shimadzu Qp-2010 Plus

Sample Information  
 Analyzed by : Dr. Mai Younis  
 Analyzed : 23/01/2007 07:30:04  
 Sample Name : W12b  
 Sample ID :  
 Customer Name : Dr. Abdou Othman - Science - Cairo  
 Data File : C:\GCMSsolution\Data\Project1\W... QGD  
 Org Data File : C:\GCMSsolution\Data\Project1\W... QGD  
 Method File : C:\GCMSsolution\Data\Project1\High Temperature Op  
 Org Method File : C:\GCMSsolution\Data\Project1\High Temperature Op  
 Report File :  
 Tuning File : C:\GCMSsolution\System1\Tune1\\_default.qgt  
 SEndf5Modified by : Dr. Mai Younis  
 Modified : 23/01/2007 07:38:16

Method  
 Analytical Line 1  
 IonSourceTemp : 250.00 °C  
 [MS Table]  
 ~Group 1 - Event 1~  
 Start Time : 0.00min  
 End Time : 10.00min  
 ACQ Mode : Scan  
 Event Time : 0.50sec  
 Scan Speed : 1000  
 Start m/z : 50.00  
 End m/z : 500.00  
 Electron Voltage : 70 eV  
 Ionization Mode : EI

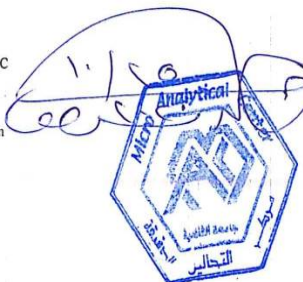

C:\GCMSsolution\Data\Project1\W...QGD

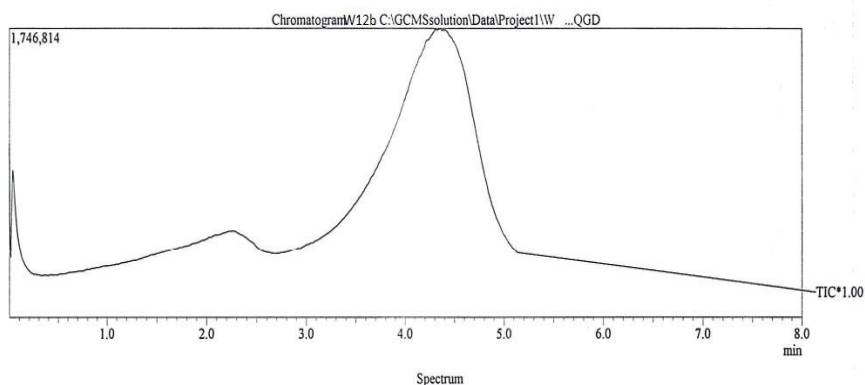

Line#1 R.Time:4.1(Scan#:497)  
 MassPeaks:309  
 RawMode:Single 4.1(497) BasePeak:311(172215)  
 BG Mode:None Group 1 - Event 1

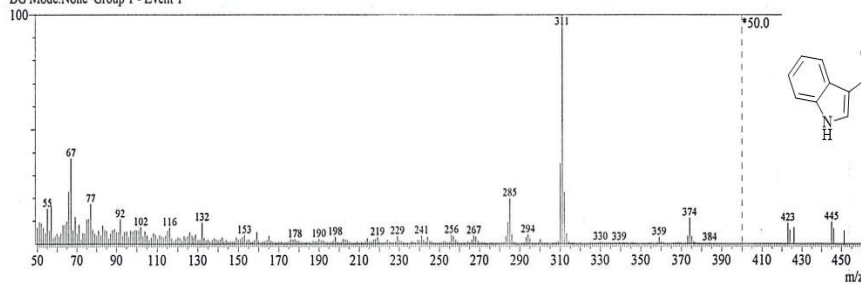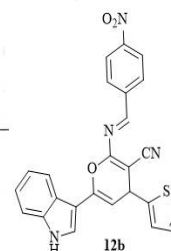

Mass spectrum for compound 12b

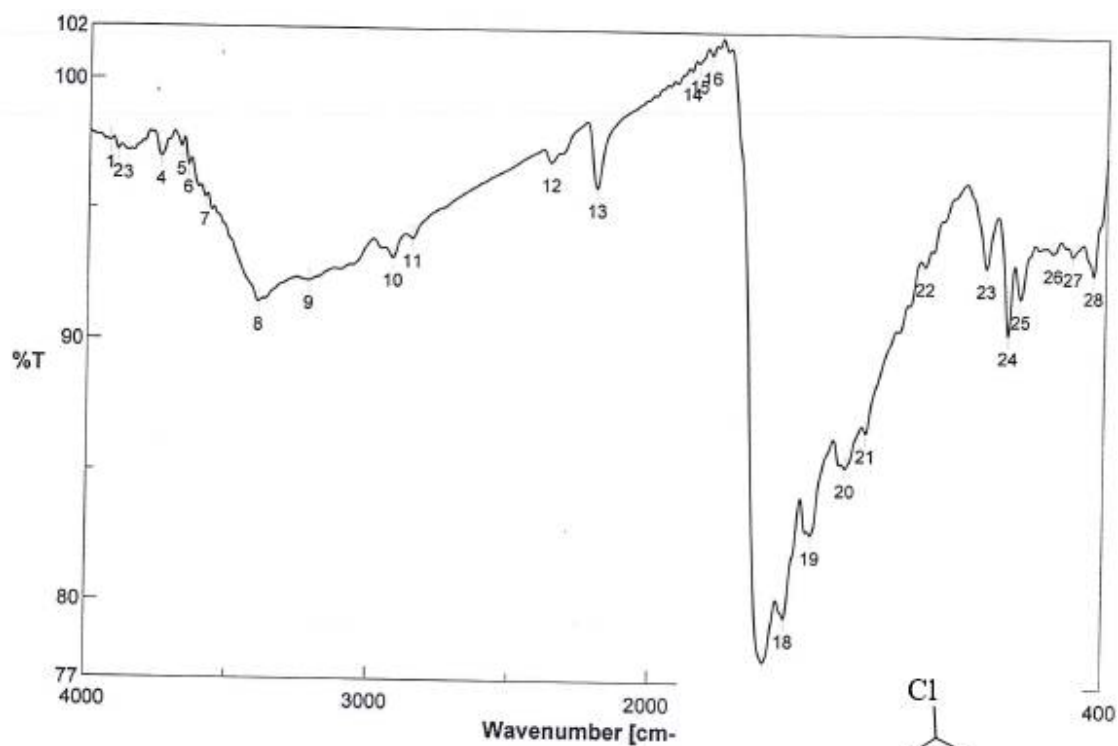

|                |                   |
|----------------|-------------------|
| Accumulation   | 16                |
| Resolution     | 4 cm-1            |
| Zero Filling   | ON                |
| Apodization    | Cosine            |
| Gain           | Auto (2)          |
| Scanning Speed | Auto (2 mm/sec)   |
| Date/Time      | 10/20/2020 0:37PM |
| Update         | 10/20/2020 0:39PM |
| Operator       |                   |
| File Name      | Memory#125        |
| Sample Name    | W 14              |
| Comment        |                   |

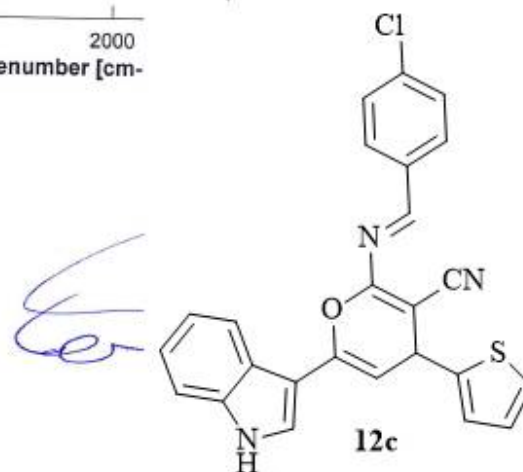

**IR spectrum for compound 12c**



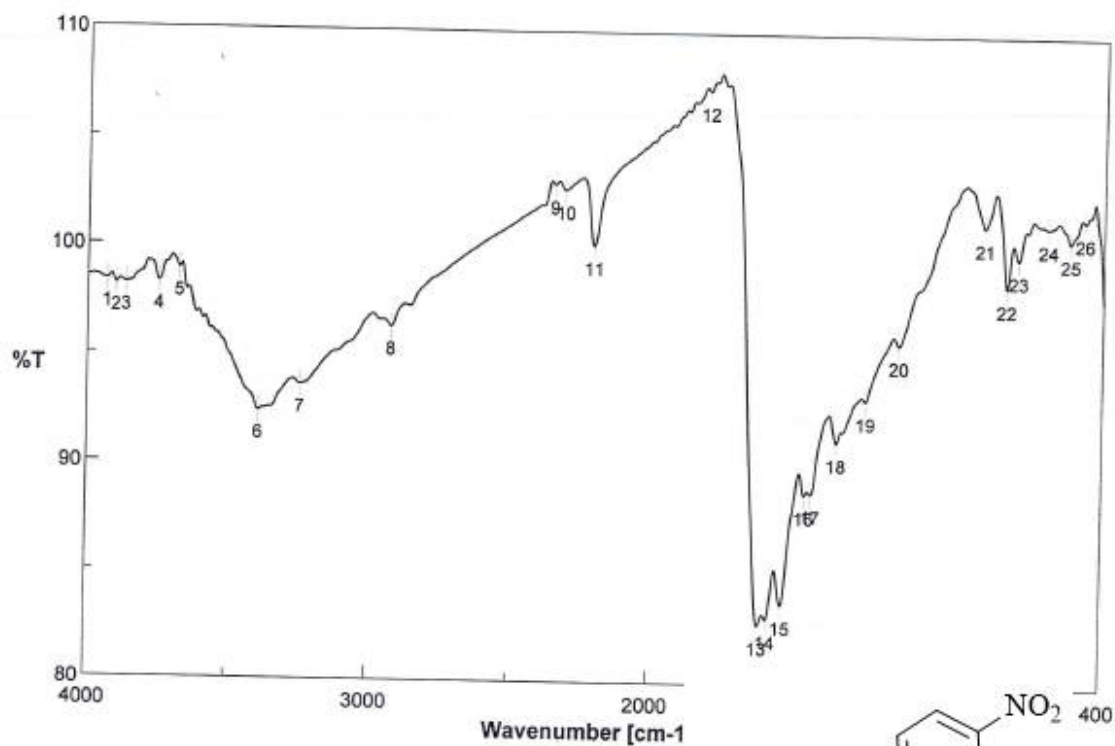

|                |                    |
|----------------|--------------------|
| Accumulation   | 16                 |
| Resolution     | 4 cm <sup>-1</sup> |
| Zero Filling   | ON                 |
| Apodization    | Cosine             |
| Gain           | Auto (2)           |
| Scanning Speed | Auto (2 mm/sec)    |
| Date/Time      | 10/20/2020 0:34PM  |
| Update         | 10/20/2020 0:35PM  |
| Operator       |                    |
| File Name      | Memory#115         |
| Sample Name    | W15                |
| Comment        |                    |

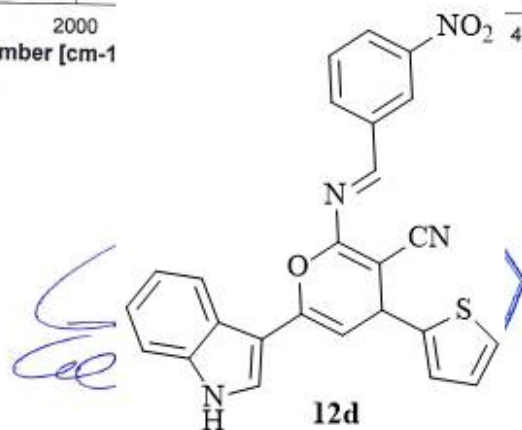

**IR spectrum for compound 12d**

Maged AbdElRaaof\_H\_W12d

Microanalytical Unit - FOPCU - NMR laboratory  
www.pharma.cu.edu.eg dir-mau.fopcu@pharma.cu.edu.eg

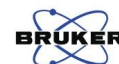

Current Data Parameters  
NAME Maged AbdElRaaof\_H\_W12d  
EXPNO 10  
PROCNO 1  
F2 - Acquisition Parameters  
Date\_ 20210119  
Time 14.32  
INSTRUM spect  
PROBHD 5 mm PABBO BB/  
PULPROG zg30  
TD 65536  
SOLVENT DMSO  
NS 32  
DS 2  
SWH 8012.820 Hz  
FIDRES 0.122256 Hz  
AQ 4.0894465 sec  
RG 202.37  
DM 62.400 usec  
DE 6.50 usec  
TE 298.1 K  
D1 1.0000000 sec  
TD0 1  
===== CHANNEL f1 =====  
SFO1 400.1924713 MHz  
NUC1 1H  
P1 15.00 usec  
PLW1 10.3999962 W  
F2 - Processing parameters  
SI 65536  
SF 400.1900000 MHz  
WDW EM  
SSB 0  
LB 0.30 Hz  
GB 0  
PC 1.00

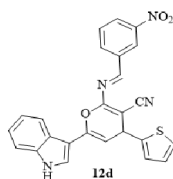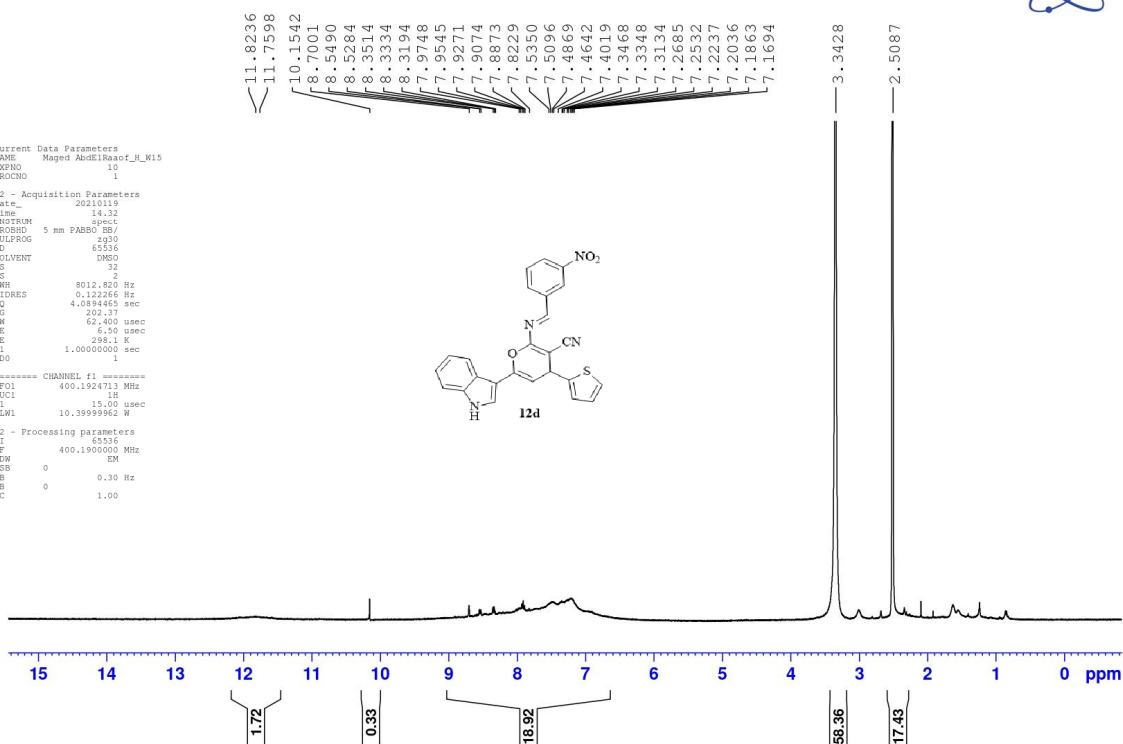

**<sup>1</sup>H-NMR spectrum for compound 12d**

23-Jan-07

# Cairo University Micro Analytical Center

## DI Analysis Shimadzu Qp-2010 Plus

Sample Information  
 Analyzed by : Dr. Mai Younis  
 Analyzed : 23/01/2007 07:33:04  
 Sample Name : W12d  
 Sample ID :  
 Customer Name : Dr. Abdou Othman - Science - Cairo  
 Data File : C:\GCMSsolution\Data\Project1\W ....QGD  
 Org Data File : C:\GCMSsolution\Data\Project1\W ....QGD  
 Method File : C:\GCMSsolution\Data\Project1\High Temperature Op  
 Org Method File : C:\GCMSsolution\Data\Project1\High Temperature Op  
 Report File :  
 Tuning File : C:\GCMSsolution\System1\Tune1\default.qgt  
 SEndIfSModified by : Dr. Mai Younis  
 Modified : 23/01/2007 07:38:16

Method  
 ===== Analytical Line 1 =====  
 IonSourceTemp :250.00 °C  
 [MS Table]  
 --Group 1 - Event 1--  
 Start Time :0.00min  
 End Time :10.00min  
 ACQ Mode :Scan  
 Event Time :0.50sec  
 Scan Speed :1000  
 Start m/z :50.00  
 End m/z :500.00  
 Electron Voltage :70 eV  
 Ionization Mode :EI

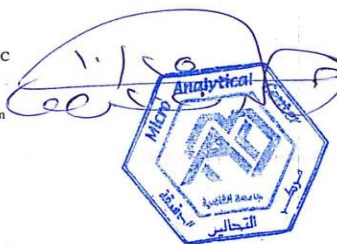

C:\GCMSsolution\Data\Project1\W ....QGD

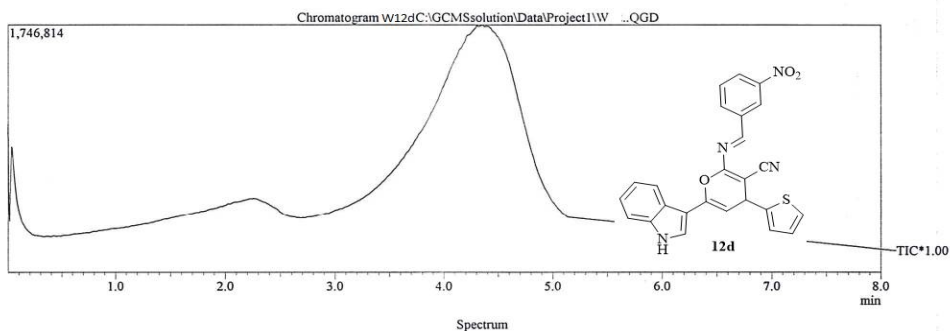

Line#1 R.Time:4.1(Scan#:497)  
 MassPeaks:309  
 RawMode:Single 4.1(497) BasePeak:311(172215)  
 BG Mode:None Group 1 - Event 1

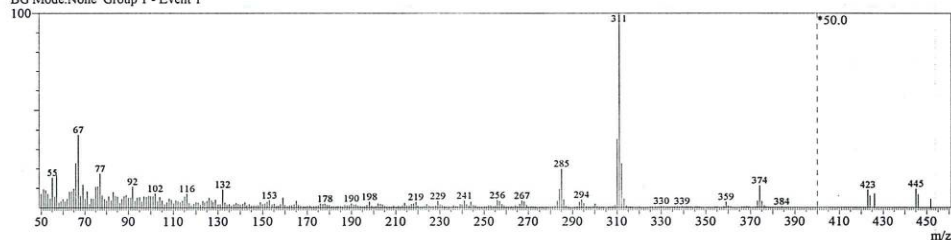

Mass Table  
 Line#1 R.Time:4.1(Scan#:497)  
 MassPeaks:309  
 RawMode:Single 4.1(497) BasePeak:311(172215)  
 BG Mode:None Group 1 - Event 1

| # | m/z   | Abs. In | Rel. Int. | # | m/z   | Abs. In | Rel. Int. | # | m/z   | Abs. In | Rel. Int. |
|---|-------|---------|-----------|---|-------|---------|-----------|---|-------|---------|-----------|
| 1 | 50.00 | 12046   | 6.99      | 4 | 53.05 | 11943   | 6.93      | 7 | 56.10 | 9650    | 5.60      |
| 2 | 51.05 | 16019   | 9.30      | 5 | 54.10 | 7876    | 4.57      | 8 | 57.05 | 28638   | 16.63     |
| 3 | 52.05 | 15057   | 8.74      | 6 | 55.05 | 26382   | 15.32     | 9 | 58.05 | 4229    | 2.46      |

## Mass spectrum for compound 12d

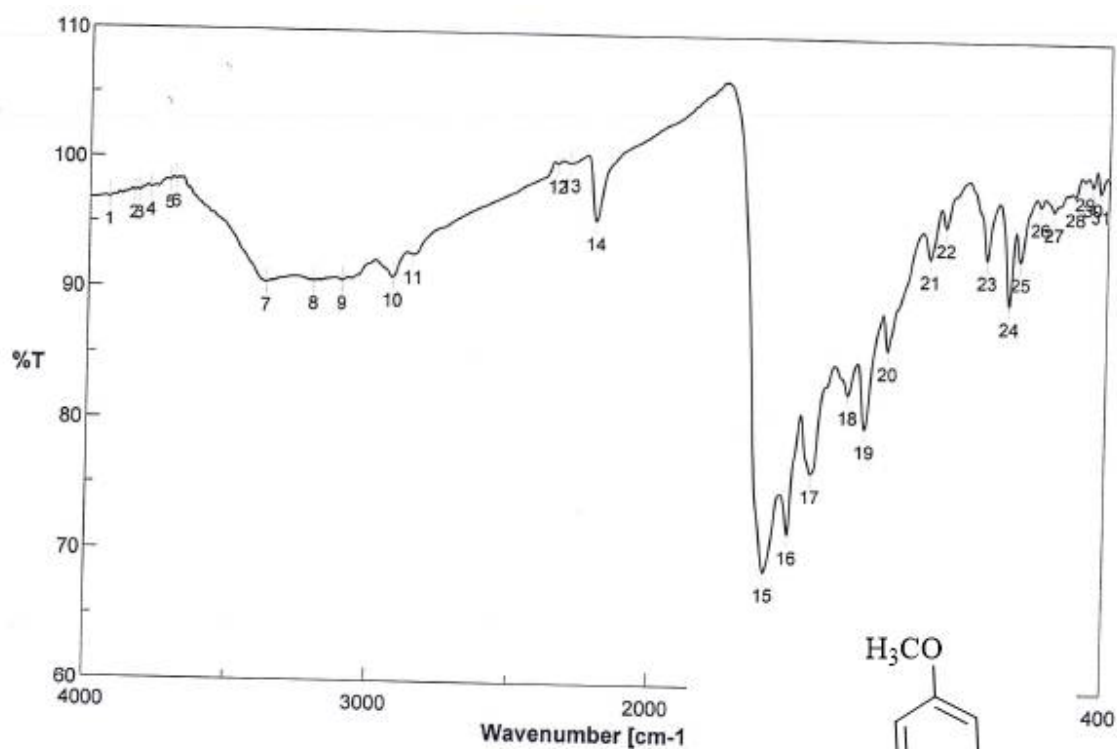

|                |                   |
|----------------|-------------------|
| Accumulation   | 16                |
| Resolution     | 4 cm-1            |
| Zero Filling   | ON                |
| Apodization    | Cosine            |
| Gain           | Auto (2)          |
| Scanning Speed | Auto (2 mm/sec)   |
| Date/Time      | 10/20/2020 0:47PM |
| Update         | 10/20/2020 0:47PM |
| Operator       |                   |
| File Name      | Memory#150        |
| Sample Name    | W 16              |
| Comment        |                   |

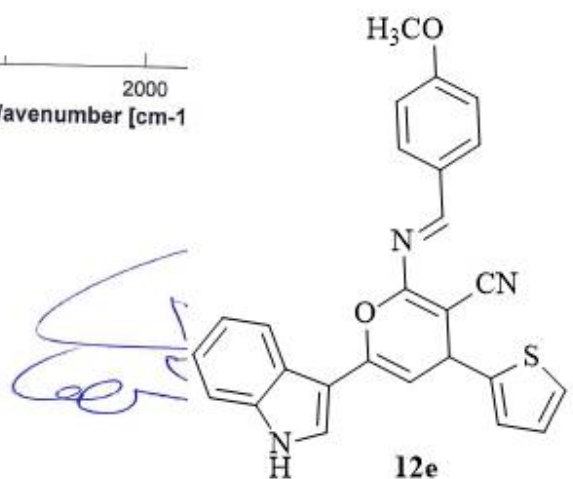

**IR spectrum for compound 12e**

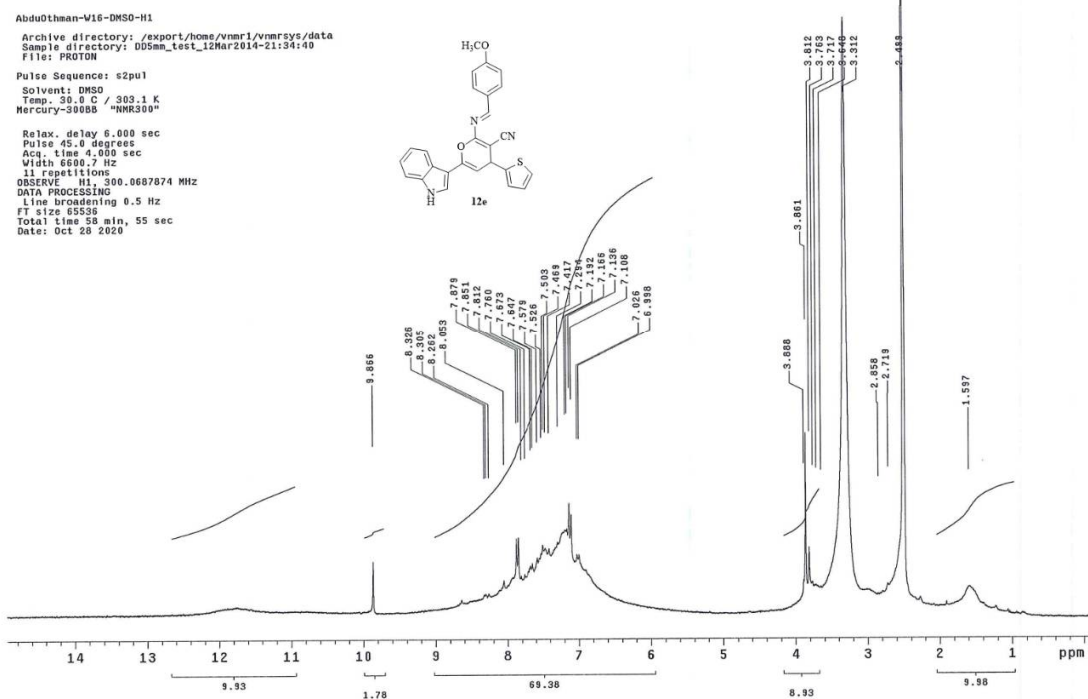

**<sup>1</sup>H-NMR spectrum for compound 12e**

23-Jan-07

# Cairo University Micro Analytical Center

## DI Analysis Shimadzu Qp-2010 Plus

Sample Information  
 Analyzed by : Dr. Mai Younis  
 Analyzed : 23/01/2007 07:33:0  
 Sample Name : W12e  
 Sample ID :  
 Customer Name : Dr. Abdou Othman - Science - Cairo  
 Data File : C:\GCMSSolution\Data\Project1\W12e.QGD  
 Org Data File : C:\GCMSSolution\Data\Project1\W12e.QGD  
 Method File : C:\GCMSSolution\Data\Project1\High Temperature Op  
 Org Method File : C:\GCMSSolution\System\Tune1\default.qgt  
 Report File :  
 Tuning File :  
 SEndIfSModified by : Dr. Mai Younis  
 Modified : 23/01/2007 07:38:16

Method  
 Analytical Line 1  
 IonSourceTemp : 250.00 °C  
 [MS Table]  
 --Group 1 - Event 1--  
 Start Time : 0.00min  
 End Time : 10.00min  
 ACQ Mode : Scan  
 Event Time : 0.50sec  
 Scan Speed : 1000  
 Start m/z : 50.00  
 End m/z : 500.00  
 Electron Voltage : 70 eV  
 Ionization Mode : EI

C:\GCMSSolution\Data\Project1\W12..QGD

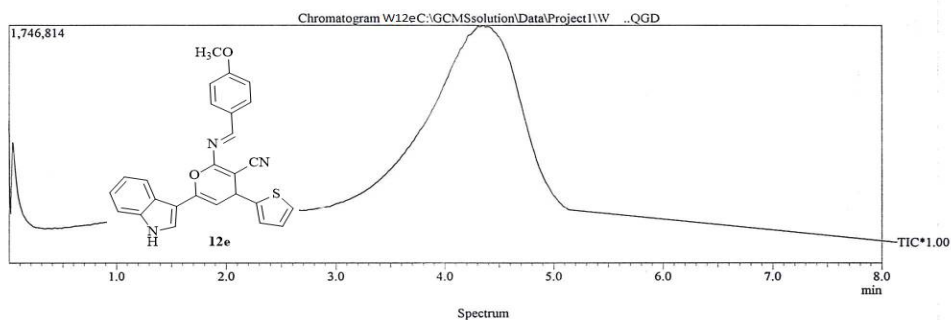

Line#1 R.Time:4.1(Scan#:497)  
 MassPeaks:309  
 RawMode:Single 4.1(497) BasePeak:311(172215)  
 BG Mode:None Group 1 - Event 1

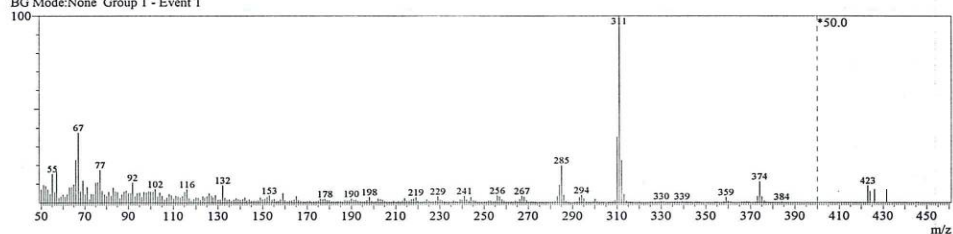

Mass Table  
 Line#1 R.Time:4.1(Scan#:497)  
 MassPeaks:309  
 RawMode:Single 4.1(497) BasePeak:311(172215)  
 BG Mode:None Group 1 - Event 1

| # | m/z   | Abs. In | Rel. Int. | # | m/z   | Abs. In | Rel. Int. | # | m/z   | Abs. In | Rel. Int. |
|---|-------|---------|-----------|---|-------|---------|-----------|---|-------|---------|-----------|
| 1 | 50.00 | 12046   | 6.99      | 4 | 53.05 | 11943   | 6.93      | 7 | 56.10 | 9650    | 5.60      |
| 2 | 51.05 | 16019   | 9.30      | 5 | 54.10 | 7876    | 4.57      | 8 | 57.05 | 28638   | 16.63     |
| 3 | 52.05 | 15057   | 8.74      | 6 | 55.05 | 26382   | 15.32     | 9 | 58.05 | 4229    | 2.46      |

1 / 3

## Mass spectrum for compound 12e
